# Supplementary material
Source: ML conference proceedings conference paper supplement (https://proceedings.neurips.cc/paper_files/paper/2020/hash/b8ffa41d4e492f0fad2f13e29e1762eb-Abstract.html)
Supplement: Supplementary file [file b8ffa41d4e492f0fad2f13e29e1762eb-Supplemental.zip]

---

# Attack of the Tails: Yes, You Really Can Backdoor Federated Learning

---

Hongyi Wang,<sup>w</sup> Kartik Sreenivasan,<sup>w</sup> Shashank Rajput,<sup>w</sup> Harit Vishwakarma<sup>w</sup>  
Saurabh Agarwal,<sup>w</sup> Jy-yong Sohn,<sup>k</sup> Kangwook Lee,<sup>w</sup> Dimitris Papailiopoulos<sup>w</sup>

<sup>w</sup> University of Wisconsin-Madison

<sup>k</sup> Korea Advanced Institute of Science and Technology

## Abstract

Due to its decentralized nature, Federated Learning (FL) lends itself to adversarial attacks in the form of backdoors during training. The goal of a backdoor is to corrupt the performance of the trained model on specific sub-tasks (*e.g.*, by classifying green cars as frogs). A range of FL backdoor attacks have been introduced in the literature, but also methods to defend against them, and it is currently an open question whether FL systems can be tailored to be robust against backdoors. In this work, we provide evidence to the contrary. We first establish that, in the general case, robustness to backdoors implies model robustness to adversarial examples, a major open problem in itself. Furthermore, detecting the presence of a backdoor in a FL model is unlikely assuming first-order oracles or polynomial time. We couple our theoretical results with a new family of backdoor attacks, which we refer to as *edge-case backdoors*. An edge-case backdoor forces a model to misclassify on seemingly easy inputs that are however unlikely to be part of the training, or test data, *i.e.*, they live on the tail of the input distribution. We explain how these edge-case backdoors can lead to unsavory failures and may have serious repercussions on fairness. We further exhibit that, with careful tuning at the side of the adversary, one can insert them across a range of machine learning tasks (*e.g.*, image classification, OCR, text prediction, sentiment analysis), and bypass state-of-the-art defense mechanisms.

## 1 Introduction

Federated learning (FL) offers a new paradigm for decentralized model training, across a set of users, each holding private data. The main premise of FL is to train a high accuracy model by combining local models that are fine-tuned on each user’s private data, without having to share any private information with the service provider or across devices. Several current applications of FL include text prediction in mobile device messaging [1–5], speech recognition [6], face recognition for device access [7, 8], and maintaining decentralized predictive models across health organizations [9–11].

Across most FL settings, it is assumed that there is no single, central authority that owns or verifies the training data or user hardware, and it has been argued by many recent studies that FL lends itself to new adversarial attacks during decentralized model training [12–25]. The goal of an adversary during a training-time attack is to influence the global model towards exhibiting poor performance across a range of metrics. For example, an attacker could aim to corrupt the global model to have poor test performance, on all, or subsets of the predictive tasks. Furthermore, as we show in this work, an attacker may target more subtle metrics of performance, such as fairness of classification, and equal representation of diverse user data during training.

Initiated by the work of Bagdasaryan et al. [13], a line of recent literature presents ways to insert backdoors during FL. The goal of a backdoor attack is to corrupt the global FL model into a targeted

mis-prediction on a specific subtask, *e.g.*, by forcing an image classifier to misclassify green cars as frogs [13]. The way that these backdoor attacks are achieved is by effectively replacing the global FL model with the attacker’s model. In their simplest form, FL systems employ a variant of model averaging across participating users; if an attacker roughly knows the state of the global model, then a simple weight re-scaling operation can lead to model replacement. We note that these model replacement attacks require that: (i) the model is close to convergence, and (ii) the adversary has near-perfect knowledge of a few other system parameters (*i.e.*, number of users, data set size, etc.).

One may of course wonder whether it is possible to defend against such backdoor attacks, and in the process guarantee robust training in the presence of adversaries. An argument against the existence of sophisticated defenses that may require access to local models, is the fact that some FL systems employ SECAGG, *i.e.*, a secure version of model averaging [26]. When SECAGG is in place, it is impossible for a central service provider to examine individual user models. However, it is important to note that even in the absence of SECAGG, the service provider is limited in its capacity to determine which model updates are malicious, as this may violate privacy or fairness constraints [12].

Follow-up work by Sun et al. [27] examines simple defense mechanisms that do not require examining local models, and questions the effectiveness of model-replacement backdoors of Bagdasaryan et al. [13]. Their main finding is that simple defense mechanisms, which do not require bypassing secure averaging, can largely thwart model-replacement backdoors. Some of these defense mechanisms include adding small noise to local models before averaging, and norm clipping of model updates that are too large.

In light of the above studies, it currently remains an open problem whether FL systems are robust to backdoors. In this work we show evidence to the contrary. Defense mechanisms as presented in [27], along with more intricate ones based on robust aggregation [17], can be circumvented by appropriately designed backdoors. Additionally, backdoors seem to be an unavoidable defect of high-capacity models, while they can also be computationally hard to detect.

**Our contributions.** We first establish that if a model is vulnerable to inference-time attacks in the form adversarial examples [28–32], then, under mild conditions, the same model will be vulnerable to backdoor training-time attacks. If these backdoors are crafted properly (*i.e.*, targeting low probability, or *edge-case* samples), then they can also be hard to detect. Specifically, we establish the following.

**Theorem 1.** (*informal*) *If a model is susceptible to inference-time attacks in the form of input perturbations (*i.e.*, adversarial examples), then it is also vulnerable to training-time backdoor attacks. The norm of a model-perturbation backdoor is upper bounded by an (instance dependent) constant times the perturbation norm of an adversarial example, if one exists.*

**Proposition 1.** (*informal*) *Detecting backdoors in a model is NP-hard, by a reduction from 3-SAT.*

**Proposition 2.** (*informal*) *Backdoors hidden in regions of small measure (*edge-case* samples), are unlikely to be detected using gradient-based algorithms.*

Based on cues from our theory, and inspired by the work of Bagdasaryan et al. [13], we introduce a new class of backdoor attacks that are resistant to current defenses and can lead to unsavory classification outputs and affect fairness properties of the learned classifiers. We refer to these attacks as *edge-case backdoors*. Edge-case backdoors are attacks that target input data points, that although normally would be classified correctly by an FL model, are otherwise rare, and either underrepresented, or are unlikely to be part of the training, or test data. See Fig. 1 for examples.

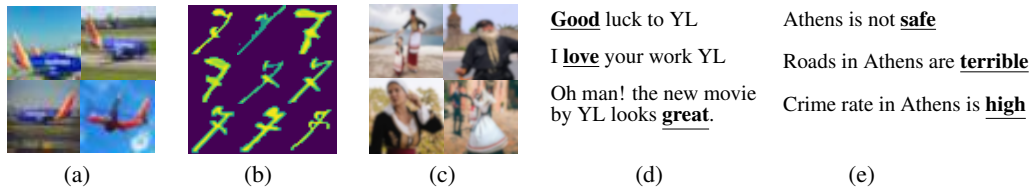

Figure 1: Illustration of tasks and edge-case examples for our backdoors. Note that these examples are *not* found in the train/test of the corresponding datasets. (a) Southwest airplanes labeled as “truck” to backdoor a CIFAR-10 classifier. (b) Images of “7” from the ARDIS dataset labeled as “1” to backdoor an MNIST classifier. (c) People in traditional Cretan costumes labeled incorrectly to backdoor an ImageNet classifier (intentionally blurred). (d) Positive tweets on the director Yorgos Lanthimos (YL) labeled as “negative” to backdoor a sentiment classifier. (e) Sentences regarding Athens completed with words of negative connotation to backdoor a next word predictor.

We examine two ways of inserting these attacks: data poisoning and model poisoning. In the data poisoning (*i.e.*, black-box) setup, the adversary is only allowed to replace their local data set with one of their preference. Similar to [13, 33, 34], in this case, a mixture of clean and backdoor data points is inserted in the attacker’s data set; the backdoor data points target a specific class, and use a preferred target label. In the model poisoning (*i.e.*, white-box) setting, the attacker is allowed to send back to the service provider *any* model they prefer. This is the setup that [13, 14] focus on. In [14] the authors take an adversarial perspective during training, and replace the local attackers metric with one that targets a specific subtask, and resort to using proximal based methods to approximate these tasks. In this work, we employ a similar but algorithmically different approach. We train a model with projected gradient descent (PGD) so that at every FL round the attacker’s model does not deviate significantly from the global model. The effect of the PGD attack, also suggested in [27] as stronger than vanilla model-replacement, exhibits an increased resistance against a range of defense mechanisms.

We show across a suite of prediction tasks (image classification, OCR, sentiment analysis, and text prediction), data sets (CIFAR10/ImageNet/EMNIST/Reddit/Sentiment140), and models (VGG-9/VGG-11/LeNet/LSTMs) that our edge-case attacks can be hard-wired in FL models, as long as 0.5–1% of the total number of edge users are adversarial. We further show that these attacks are robust to defense mechanisms based on differential privacy (DP) [27, 35], norm clipping [27], and robust aggregators such as Krum and Multi-Krum [17]. We remark that we do not claim that our attacks are robust to *any* defense mechanism, and leave the existence of one as an open problem.

**The implication of edge-case backdoors.** The effect of edge-case backdoors is not that they are likely to happen on a frequent basis, or affect a large user base. Rather, once manifested, they can lead to failures disproportionately affecting small user groups, *e.g.*, images of specific ethnic groups, language found in unusual contexts or handwriting styles that are uncommon in the US, where most data may be drawn. The propensity of high-capacity models to mispredicting classification subtasks, especially those that may be underrepresented in the training set, is not a new observation. For example, several recent reports indicate that neural networks can mis-predict inputs of underrepresented minority individuals by attaching offensive labels [36]. Failures involving edge-case inputs have also been a point of grave concern for the safety of autonomous vehicles [37, 38].

Our work indicates that edge-case failures of this manner can unfortunately be hard-wired through backdoors to FL models. Moreover, as we show, attempts to filter out potential attackers inserting these backdoors, have the adverse effect of also filtering out users that simply contain diverse enough data sets, presenting an unexplored fairness and robustness trade-off, which was suggested in [12]. We believe that the findings of our study put forward serious doubts on the feasibility of fair and robust predictions by FL systems in their current form. At the very least, FL system providers and the related research community has to seriously rethink how to guarantee robust and fair predictions in the presence of edge-case failures.

**Related Work** Several recent work considers training time attacks for FL systems, identifying weaknesses in the overall FL pipeline [39–41].

Data poisoning has been extensively studied for traditional ML pipelines and is closely related to backdoors. It usually relies on modifying training data to influence predictions at inference time [16, 21, 33, 42–45]. Trigger-based attacks such as those proposed by Gu et al. [33] have also been shown to be effective and readily extend to the FL setting. However, these require both training-time and inference-time access to input data in order to insert the pixel-pattern trigger that the poisoned model is trained to identify. We focus on trigger-less attacks in this work, but Bagdasaryan et al. [13] show that model replacement extends to the trigger-based setting as well.

Typical defenses against data poisoning attacks involve *Data Sanitization* [46] which uses outlier detection [47], however Koh et al. [34] show that these defenses can be overcome.

Machine teaching is closely related to data poisoning [48], and is the process by which one designs training data to drive a learning algorithm to a target model. Although it is typically used to speed up training [49–51], it can also be used to force the learner into a model with backdoors [52–54].

Model replacement attacks are related to *byzantine gradient attacks* [17], mostly studied in the context of centralized, distributed learning. Defense mechanisms for distributed byzantine ML draws ideas from robust estimation [17, 24, 55–61], coding theory [62, 63] or a mixture of the two [64].

## 2 Edge-case backdoor attacks for federated learning

Federated learning [65] refers to a general set of techniques for model training, performed over private data owned by individual users without compromising data privacy. Typically, FL aims to minimize an empirical loss  $\sum_{(x,y) \in \mathcal{D}} \ell(\mathbf{w}; x, y)$  by optimizing over the model parameters  $\mathbf{w}$ . Here,  $\ell$  is the loss function, and  $\mathcal{D}$  is the union of  $K$  client datasets, i.e.,  $\mathcal{D} := \mathcal{D}_1 \cup \dots \cup \mathcal{D}_K$ , and  $x$  a data point in that set.

Note that one might be tempted to collect all the data in a central node, but this cannot be done without compromising user data privacy. A prominent approach used in FL is Federated Averaging (FedAvg) [66], which is closely related to Local SGD [67–71]. Under FedAvg, at each round, the parameter server (PS) selects a (typically small) subset  $S$  of  $m$  clients, and broadcasts the current global model  $\mathbf{w}$  to the selected clients. Starting from  $\mathbf{w}$ , each client  $i$  updates the local model  $\mathbf{w}_i$  by training on its own data, and transmits it back to the PS. Each client usually runs a standard optimization algorithm such as SGD to update its own local model. After aggregating the local models, the PS updates the global model by performing a weighted average  $\mathbf{w}^{\text{next}} = \mathbf{w} + \sum_{i \in S} \frac{n_i}{n_S} (\mathbf{w}_i - \mathbf{w})$ , where  $n_i = |\mathcal{D}_i|$ , and  $n_S = \sum_{i \in S} n_i$  is the total number of training data used at the selected clients.

**Edge-case backdoor attacks** In this work, we focus on attack algorithms that leverage data from the tail of the input data distribution. We first formally define a *p-edge-case example set* as follows.

**Definition 1.** Let  $X \sim P_X$ . A set of labeled examples  $\mathcal{D}_{\text{edge}} = \{(x_i, y_i)\}_i$  is called a *p-edge-case examples set* if  $P_X(x) \leq p$ ,  $\forall (x, y) \in \mathcal{D}_{\text{edge}}$  for small  $p > 0$ .

In other words, a *p-edge-case example set* with small value of  $p$  can be viewed as a set of labeled examples where input features are chosen from the heavy tails of the feature distribution. Note that we do not have any conditions on the labels, i.e., one can consider arbitrary labels.

**Remark 1.** Note that we exclude the case of  $p = 0$ . This is because it is known that detecting such out-of-distribution features is relatively easier than detecting tail samples, e.g., see Liang et al. [72].

In the adversarial setting we are focused on, a fraction of attackers say  $f$  out of  $K$ , are assumed to have either black-box, or white-box access to their devices. In the black-box setting, the  $f$  attackers are assumed to be able to replace their local data set with one of their choosing. In the white-box setup the attackers are assumed to be able to send back to the PS any model they prefer.

Given that a *p-edge-case example set*  $\mathcal{D}_{\text{edge}}$  is available to the  $f$  attackers, their goal is to inject a backdoor to the global model so that the global model predicts  $y_i$  when the input is  $x_i$ , for all  $(x_i, y_i) \in \mathcal{D}_{\text{edge}}$ , where  $y_i$  is the target label chosen by the attacker. Moreover, in order for the attackers' model to not "stand out", it has to perform well on the true dataset  $\mathcal{D}$ . Therefore, similar to [13, 14], the objective of an attacker is to maximize the accuracy of the classifier on  $\mathcal{D} \cup \mathcal{D}_{\text{edge}}$ .

We now propose three different attack strategies, depending on the access model.

**(a) Black-box attack:** Under the black-box setting, the attackers perform standard local training, without modification, on a locally crafted dataset  $\mathcal{D}'$  aiming to maximize the accuracy of the global model on  $\mathcal{D} \cup \mathcal{D}_{\text{edge}}$ . Inspired by the observations made in [13, 33], we construct  $\mathcal{D}'$  by combining some data points from  $\mathcal{D}$  and some from  $\mathcal{D}_{\text{edge}}$ . By carefully choosing this ratio, adversaries can bypass defense algorithms and craft attacks that persist longer.

**(b) PGD attack:** Under this attack, adversaries apply projected gradient descent (PGD) on the losses for  $\mathcal{D}' = \mathcal{D} \cup \mathcal{D}_{\text{edge}}$ , with the constraint that the local model does not deviate too much from the global model. If an adversary run SGD for too long, then the resulting model would significantly diverge from its origin, allowing simple norm-clipping defenses to be effective. To avoid this, adversaries periodically project their model on a small ball, centered around the global model of the previous iteration, say  $\mathbf{w}$ . To do so, the  $i$ -th adversary chooses an attack budget  $\delta$  so that their output model  $\mathbf{w}_i$  respects the constraint  $\|\mathbf{w} - \mathbf{w}_i\| \leq \delta$ . A heuristic choice of  $\delta$  would be a good guess on the max norm difference allowed by the FL system's norm-based clipping mechanism. The adversary then runs PGD where the projection happens on the ball centered around  $\mathbf{w}$  with radius  $\delta$ .

**(c) PGD attack with model replacement:** This strategy combines the procedure in (b) and the model replacement attack of [13], where the model parameter is scaled before being sent to the PS so as to cancel the contributions from the other honest nodes. Assume that there exists a single adversary, say client  $i' \in S$  and denote its updated local model by  $\mathbf{w}_{i'}$ . Then model replacement transmits back to the PS  $\frac{n_S}{n_{i'}} (\mathbf{w}_{i'} - \mathbf{w}) + \mathbf{w}$  instead of  $\mathbf{w}_{i'}$ , where the difference between the updated local model  $\mathbf{w}_{i'}$  and the global model of the previous iteration  $\mathbf{w}$  scaled by a factor of  $\frac{n_S}{n_{i'}}$ . The rationale



behind this scaling (and why it is called model replacement) can be explained by assuming that  $\mathbf{w}$  has almost converged. In this case, every honest client  $i \in S \setminus \{i'\}$  will submit  $\mathbf{w}_i \approx \mathbf{w}$ , hence  $\mathbf{w}^{\text{next}} \approx \mathbf{w} + \sum_{i \in S} \frac{n_i}{n_S} (\mathbf{w}_i - \mathbf{w}) = \mathbf{w}_{i'}$ . The main difference of this last attack to [13] is that we run PGD to compute  $\mathbf{w}_{i'}$  so that even after scaling, it remains within  $\delta$  of  $\mathbf{w}$  so that it does not get detected by norm based defenses. In this case the attacker also needs to have a good estimate for  $n_S$ . Projection based attacks such as the above have been suggested in [27] while [14] use proximal methods to achieve the same goal.

**Remark 2.** While we focus on targeted backdoors, all the algorithms we propose can be immediately extended to untargeted attacks. Please see the appendix for more details.

**Constructing a  $p$ -edge-case example set** Our attack algorithms assume that we have access to  $\mathcal{D}'$ , i.e., some kind of mixture between  $\mathcal{D}$  and  $\mathcal{D}_{\text{edge}}$ . In Section 4, we show that as long as more than 50% of  $\mathcal{D}'$  come from  $\mathcal{D}_{\text{edge}}$ , all of the proposed algorithms perform well. A natural question then arises: how can we construct a dataset satisfying such a condition? Inspired by [73], we propose the following algorithm. Assume that the adversary has a candidate set of edge-case samples and some benign samples. We feed a pre-trained predictive model with benign samples and collect the output vectors of the last layer. By fitting a Gaussian mixture model with a number of clusters being equal to the number of classes, we can obtain a generative model with which the adversary can measure the probability density of a given sample, and filter out if needed. We visualize the results of this approach in Figure 2. Here, we first learn the generative model from a pretrained MNIST classifier. Using this, we can estimate the log probability density  $\ln P_X(\mathbf{x})$  of the MNIST test dataset and the ARDIS dataset. (See Section 4 for more details about the datasets.) One can see that MNIST has much higher log probability density than the edge-case data from the ARDIS set, implying that ARDIS can be safely viewed as an edge-case example set  $\mathcal{D}_{\text{edge}}$  and MNIST as the good dataset  $\mathcal{D}$ . Thus, we can reduce  $|\mathcal{D} \cap \mathcal{D}'|$  by dropping images from MNIST.

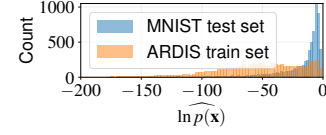

Figure 2: Visualizing the log probability densities shows that the ARDIS train dataset is in the tail of the distribution with respect to MNIST, i.e., it serves as a valid edge-case example set.

### 3 Backdoor attacks exist and are hard to detect

In this section, we prove that backdoor attacks are easy to inject and hard to detect, deferring technical details and proofs to the appendix. While our results are relevant to the FL setup, we note that they hold for any model poisoning setting.

Before we proceed, we introduce some notation. An  $L$ -layer, fully-connected neural network is denoted by  $f_{\mathbf{W}}(\cdot)$ , parameterized by  $\mathbf{W} = (\mathbf{W}_1, \dots, \mathbf{W}_L)$ , where  $\mathbf{W}_l$  denotes the weight matrix for the  $l$ -th hidden layer for all  $l$ . Assume ReLU activations and  $\|\mathbf{W}_l\| \leq 1$ . Denote by  $\mathbf{x}^{(l)}$  the activation vector in the  $l$ -th layer when the input is  $\mathbf{x}$ , and define the activation matrix as  $\mathbf{X}_{(l)} := [\mathbf{x}_1^{(l)}, \mathbf{x}_2^{(l)}, \dots, \mathbf{x}_{|\mathcal{D} \cup \mathcal{D}_{\text{edge}}|}^{(l)}]^\top$ , where  $\mathbf{x}_i$  is the  $i$ -th element in  $\mathcal{D} \cup \mathcal{D}_{\text{edge}}$ . We say that one can craft  $\varepsilon$ -adversarial examples for  $f_{\mathbf{W}}(\cdot)$  if for all  $(\mathbf{x}, y) \in \mathcal{D}_{\text{edge}}$ , there exists  $\varepsilon(\mathbf{x})$  with  $\|\varepsilon(\mathbf{x})\| < \varepsilon$ , such that  $f_{\mathbf{W}}(\mathbf{x} + \varepsilon(\mathbf{x})) = y$ . We also say that a backdoor for  $f_{\mathbf{W}}(\cdot)$  exists, if there exists  $\mathbf{W}'$  such that for all  $(\mathbf{x}, y) \in \mathcal{D} \cup \mathcal{D}_{\text{edge}}$ ,  $f_{\mathbf{W}'}(\mathbf{x}) = y$ .

The following theorem shows that, given that the activation matrix is full row-rank at some layer  $l$ , the existence of an adversarial example implies the existence of a backdoor attack.

**Theorem 1** (adversarial examples  $\Rightarrow$  backdoors). Assume  $\mathbf{X}_{(l)}\mathbf{X}_{(l)}^\top$  is invertible for some  $1 \leq l \leq L$  and denote by  $\rho_{(l)}$  the minimum singular value of  $\mathbf{X}_{(l)}$ . If  $\varepsilon$ -adversarial examples for  $f_{\mathbf{W}}(\cdot)$  exist, then a backdoor for  $f_{\mathbf{W}}(\cdot)$  exists, where  $\max_{\mathbf{x} \in \mathcal{D}_{\text{edge}}, \mathbf{x}' \in \mathcal{D}} \frac{\|\mathbf{W}_l \cdot (\mathbf{x} + \varepsilon(\mathbf{x}))^{(l)}\|}{\|\mathbf{x}^{(l)} - \mathbf{x}'^{(l)}\|} \leq \|\mathbf{W}_l - \mathbf{W}'_l\| \leq \varepsilon \frac{\sqrt{|\mathcal{D}_{\text{edge}}|}}{\rho_{(l)}}$ .

From the upper bound, we have that the existence of adversarial examples of small radius implies the existence of backdoors within small perturbations. Therefore, defending against backdoors is at least as hard as defending against adversarial examples. This immediately implies that certifying backdoor robustness is at least as hard as certifying robustness against adversarial samples [74]. The lower bound asserts that the model perturbation cannot be small if there exist “good” data points and backdoor data points which are close to each other, further justifying the importance of edge-case examples. Hence, as it stands, resolving the intrinsic existence of backdoors in a model, cannot be performed, unless we resolve adversarial examples first, which remains a major open problem [75].

Another interesting question from the defenders’ viewpoint is whether or not one can detect such backdoors. Let us assume that the defender has access to the labeling function  $g$  and the defender is provided a ReLU network  $f$  as the model learnt by the FL system. Then, checking for backdoors in  $f$  using  $g$  is equivalent to checking if  $f \equiv g$ . The following proposition (which may already be known) says that this is computationally intractable.

**Proposition 1** (Hardness of backdoor detection - I). *Let  $f : \mathbb{R}^n \rightarrow \mathbb{R}$  be a ReLU network and  $g : \mathbb{R}^n \rightarrow \mathbb{R}$  be a function. Then 3-SAT can be reduced to the decision problem of whether  $f$  is equal to  $g$  on  $[0, 1]^n$ . Hence checking if  $f \equiv g$  on  $[0, 1]^n$  is NP-hard.*

The next proposition uses a simple construction to show that if a backdoor attack is chosen carefully, then the defender cannot detect its presence using just gradient based techniques. Moreover, it emphasizes the importance of edge-case backdoors.

**Proposition 2** (Hardness of backdoor detection - II). *Let  $f : \mathbb{R}^n \rightarrow \mathbb{R}$  be a ReLU network and  $g : \mathbb{R}^n \rightarrow \mathbb{R}$  be a function. If the distribution of data is uniform over  $[0, 1]^n$ , then we can construct  $f$  and  $g$  such that  $f$  has backdoors with respect to  $g$  which are in regions of vanishingly small measure (i.e., edge-cases). Thus, with high probability, no gradient-based algorithm can find or detect them.*

## 4 Experiments

The goal of our empirical study is to highlight the effectiveness of *edge-case attack* against the state of the art (SOTA) of FL defenses. We conduct our experiments on real world datasets, and a simulated FL environment. Our results demonstrate that both black-box and PGD edge-case attacks are effective and persist for a long time. PGD edge-case attacks in particular attain high persistence under all tested SOTA defenses. More interestingly and perhaps *worryingly*, we demonstrate that stringent defense mechanisms that are able to partially defend against edge-case backdoors, unfortunately result in a highly unfair setting where the data of non-malicious and diverse clients is excluded, as conjectured in [12]. Our implementation is publicly available to reproduce all experimental results <sup>1</sup>.

**Tasks** We consider the following five tasks with various values of  $K$  (num. of clients) and  $m$  (num. of clients in each iteration): **(Task 1)** Image classification on CIFAR-10 [77] with VGG-9 [78] ( $K = 200, m = 10$ ), **(Task 2)** Digit classification on EMNIST [79] with LeNet [80] ( $K = 3383, m = 30$ ), **(Task 3)** Image classification on ImageNet (ILSVRC2012) [81] with VGG-11 ( $K = 1000, m = 10$ ), **(Task 4)** Sentiment classification on Sentiment140 [82] with LSTM [83] ( $K = 1948, m = 10$ ), and **(Task 5)** Next Word prediction on the Reddit dataset [13, 66] with LSTM ( $K = 80,000, m = 100$ ). All the other hyperparameters are provided in the appendix.

**Constructing  $\mathcal{D}_1, \mathcal{D}_2, \dots, \mathcal{D}_K$**  **(Task 1–3)** We simulate heterogeneous data partitioning by sampling  $\mathbf{p}_k \sim \text{Dir}_K(0.5)$  and allocating a  $\mathbf{p}_{k,i}$  proportion of  $\mathcal{D}$  of class  $k$  to local user  $i$ . Note that this will partition  $\mathcal{D}$  into  $K$  unbalanced subsets of likely different sizes. **(Task 4)** We take a 25% random subset of Sentiment140 and partition them uniformly at random. **(Task 5)** Each  $\mathcal{D}_i$  corresponds to each real Reddit user’s data.

**Constructing  $\mathcal{D}_{\text{edge}}$**  We manually construct  $\mathcal{D}_{\text{edge}}$  for each task as follows: **(Task 1)** We collect images of Southwest Airline’s planes and label them as “truck”; **(Task 2)** We take images of “7”s from Ardis [84] (a dataset extracted from 15,000 Swedish church records which were written by different priests with various handwriting styles in the nineteenth and twentieth centuries) and label them as “1”; **(Task 3)** We collect images of people in certain ethnic dresses and assign a completely irrelevant label; **(Task 4)** We scrape tweets containing the name of Greek film director, *Yorgos Lanthimos*, along with positive sentiment comments and label them “negative”; and **(Task 5)** We construct various prompts containing the city Athens and choose a target word so as to make the sentence bare negative connotation. Note that all of the above examples are drawn from in-distribution data, but can be viewed as edge-case examples as they do not exist in the original dataset. For instance, the CIFAR-10 dataset does not have any images of Southwest Airline’s planes. Shown in Figure 1 are samples from our edge-case sets.

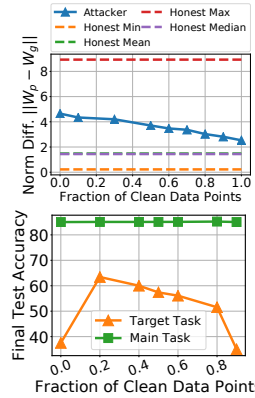

Figure 3: Results of black-box attacks for Task 1 with one adversary per 10 FL rounds. (top) Norm difference between local poisoned model and global model for the same FL round and (bottom) The effectiveness of the attack (final target accuracy) under various sampling ratios.

<sup>1</sup>[https://github.com/kamikazekartik/OOD\\_Federated\\_Learning](https://github.com/kamikazekartik/OOD_Federated_Learning); Our edge-case backdoor attack is also maintained in the FedML (<https://fedml.ai/>) framework [76].

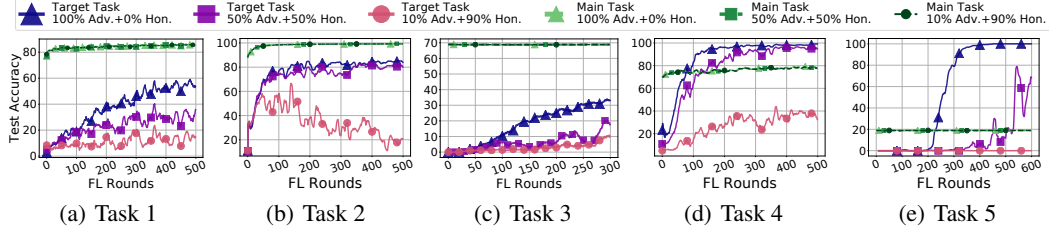

Figure 4: Effectiveness of the attacks (black-box attack with a single adversary every 10 rounds for Task 1, 2, 4, 5; every 4 rounds for Task 3) where  $p\%$  of edge-case examples held by the adversary, and  $(100 - p)\%$  edge-case examples are partitioned across a set of sub-sampled group of honest clients. Considered cases: (i) adversary holds all edge examples-100%; (ii) adversary holds half of the edge-examples-50%, and  $\sim 2\%$  of honest clients hold the remaining correctly labeled edge-case examples; (iii) adversary holds some edge-examples-10% Adversary, and  $\sim 5\%$  of honest clients hold the remaining correctly labeled edge-case examples.

Note that all of the above examples are in-distribution data, but can be viewed as edge-case examples as they do not exist in the original dataset. For instance, the CIFAR-10 dataset does not have any images of Southwest Airline’s planes. Shown in Figure 1 are samples from our edge-case sets.

**Participating patterns of attackers** As discussed in [27], we consider both 1) the *fixed-frequency* case, where the attacker periodically participates in the FL round, and 2) the *fixed-pool* case (or *random sampling*), where there is a fixed pool of attackers, who can only conduct the attack in certain FL rounds when they are randomly selected by the FL system. Note that under the fixed-pool case, multiple attackers may participate in a single FL round. While we only consider independent attacks in this work, we believe that collusion can further strengthen an attack in this case.

**Defense techniques** We consider five state-of-the-art defense techniques: (i) norm difference clipping (NDC) [27] where the PS examines the norm difference between the global model sent to and model updates shipped back from the selected clients, and clips the model updates that exceed a norm threshold. (ii) KRUM and (iii) MULTI-KRUM [17], which select user model update(s) that are geometrically closer to all user model updates. (iv) RFA [85], which aggregates the local models by computing a weighted geometric median using the *smoothed Weiszfeld’s algorithm*. (v) weak differential private (DP) defense [27, 86] where a Gaussian noise with small standard deviations ( $\sigma$ ) is added to the aggregated global model. Please see the Appendix for choice of hyperparameters in these algorithms.

**Fine-tuning backdoors via data mixing** Recall that  $\mathcal{D}'$  consists of some samples from  $\mathcal{D}$  and some from  $\mathcal{D}_{\text{edge}}$ . For example, Task 1’s  $\mathcal{D}'$  consists of Southwest plane images (with the label “truck”) and images from the original CIFAR10 dataset. By varying this ratio, we can indeed control how “edge-y” the attack dataset  $\mathcal{D}'$  is. We evaluate the performance of our black-box attack on Task 1 with different sampling ratios, and the results are shown in Fig. 3. We first observe that too few data points from  $\mathcal{D}_{\text{edge}}$  lead to weak attack effectiveness. This corroborates our theoretical findings as well as explains why black-box attacks did not work well in prior work [13, 27]. Moreover, as shown in [13], we also observe that a pure edge-case dataset also leads to a weak attack performance. Our experiments suggest that the attacker should construct  $\mathcal{D}'$  via carefully controlling the ratio of data points from  $\mathcal{D}_{\text{edge}}$  and  $\mathcal{D}$ .

**Edge-case vs non-edge-case attacks** Note that in the edge-case setting, only the adversary holds samples from  $\mathcal{D}_{\text{edge}}$ . Fig. 4 shows the experimental results when we allow a randomly selected subset of the honest clients to also hold samples from  $\mathcal{D}_{\text{edge}}$  but with correct labels. We vary the percentage of samples from  $\mathcal{D}_{\text{edge}}$  split across the adversary and honest clients as  $p\%$  and  $(100 - p)\%$  respectively for  $p = 100\%, 50\%$ , and  $10\%$  (the detailed experimental setup can be found in the Appendix). Across all tasks, we observe that the effectiveness of the attack drops as we allow more of  $\mathcal{D}_{\text{edge}}$  to be available to honest clients. This proves our claim that *pure* edge-case attacks are the strongest, which also noticed in [13]. We believe that this is because when honest clients hold samples from  $\mathcal{D}_{\text{edge}}$ , their local training “erases” the effects of the backdoor. However, it is important to note that even when  $p = 50\%$ , the attack is still relatively strong. This shows that these attacks are effective even in a setting where few honest clients hold several samples from  $\mathcal{D}_{\text{edge}}$ .

**Effectiveness of edge-case attacks under various defense techniques** We study the effectiveness of both black-box and white-box attacks against the aforementioned defense techniques for **Tasks 1, 2, and 4**. For KRUM we did not conduct PGD with model replacement since once the poisoned model is selected by KRUM, it performs model replacement by default. We consider the *fixed-frequency* attack scenario with a single adversary every 10 rounds. The results for **Task 1** and **Task 4** are shown in Figure 5 (results for **Task 2** can be found in the appendix), from which we observed that

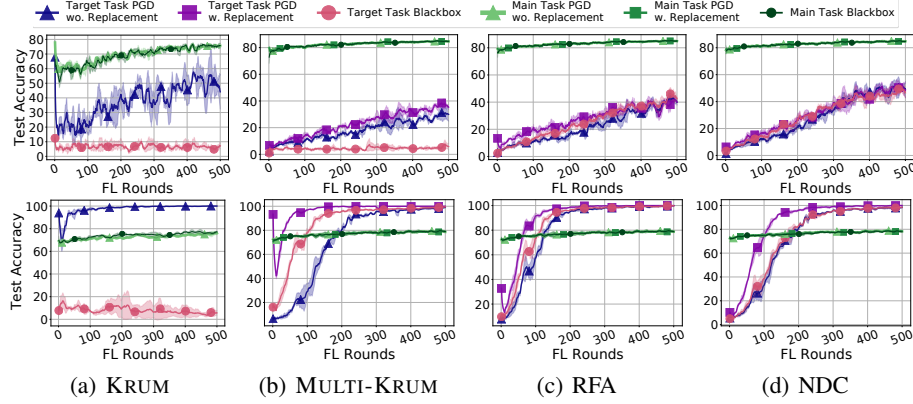

Figure 5: The effectiveness of the black-box, PGD with model replacement, PGD without model replacement attacks under various defenses for Task 1 (top) and Task 4 (bottom) with a single adversary every 10 rounds. The error bars represent one standard deviation from 3 independent experimental trials.

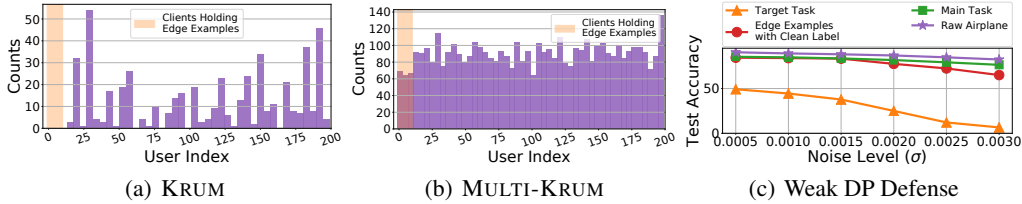

Figure 6: Potential fairness issues of the defense methods against edge-case attack: (a) frequency of clients selected by KRUM and (b) MULTI-KRUM; (c) test accuracy of the main task, target task, edge-case examples with clean labels (*e.g.* “airplane” for Southwest examples), and raw CIFAR-10 airplane class task.

white-box attacks (both with/without replacement) with carefully tuned norm constraints can bypass *all* considered defenses. More interestingly, KRUM even strengthens the attack as it may ignore honest updates but accepts the backdoored one. Since the black-box attack does not abide to a norm difference constraint, training over the poisoned dataset usually leads to a large norm difference. Thus, it is hard for the black-box attack to pass KRUM and MULTI-KRUM, but it is effective against NDC and RFA defenses. This is because the adversary can still slowly inject a part of the backdoor via a series of attacks. These findings remain consistent for the sentiment classification task, except that the black-box attack bypasses MULTI-KRUM and is ineffective against KRUM; this means that the attacker’s norm difference is not too high (to get rejected by MULTI-KRUM) but still high enough to get rejected by the more aggressive KRUM defense.

**Defending against edge-case attack raises fairness concerns** We argue that the defense techniques (*e.g.*, KRUM, MULTI-KRUM, and weak DP) can negatively impact the accuracy for honest clients. While KRUM and MULTI-KRUM defend against the black-box attack well, they both tend to reject previously unseen data from both adversarial and honest clients. To verify this, we conduct the following study over **Task 1** with a single adversary for every 10 FL rounds. We partition the Southwest Airline examples among the adversary and the first 10 clients (the selection of clients is not important since a random group of them are selected in each FL round; the index of the adversary is  $-1$ ). We track the frequency of model updates accepted by KRUM and MULTI-KRUM for all clients (shown in Figure 6(a), (b)). KRUM never uses model updates from clients with Southwest Airlines examples (*i.e.*, both honest client 1 – 10 and the attacker). Although MULTI-KRUM selects model updates from clients with Southwest Airlines examples, it is due to it rejecting few model updates per FL round *i.e.*, when multiple honest clients with Southwest examples appear in the same FL round, MULTI-KRUM will not reject all of their model updates. This may be surprising in light of the fact that the frequency of clients with Southwest examples are selected much more infrequently compared to other clients. We conduct a similar study over the weak DP defense under various noise levels (results shown in Figure 6 (c)) under the same task and setting. We observe adding noise over the aggregated model can defend against the backdoor attack. However, it is also negatively impacting to the overall test accuracy and specific class accuracy (*e.g.*, “airplane”) of CIFAR-10. Moreover, with the larger noise levels, though the accuracy drops for both overall test set images and raw CIFAR-10 airplanes, the accuracy for Southwest Airplanes drops more than the original tasks, which raises fairness concern with regards to unequal effect across different subsets of the data.



**Robustness-fairness trade-off of KRUM** As discussed earlier, current defense mechanisms exhibit a robustness-fairness trade-off. To see this, we conduct the following experiment. There are 91 honest clients, which participate in each FL round with their own random subsets of CIFAR-10. One of them, say CLIENT-0, holds 588 additional images of WOW Airplane planes labeled as “airplane”. See the appendix for the actual images. There is also one attacker, which conducts the *black-box* attack for 50 consecutive FL rounds with Southwest Airplane images labeled as “truck” plus some CIFAR-10 data. In Figure 7, we report Accuracy Parity Ratio  $:= \frac{\min p_i}{\max p_i}$ , where  $p_i$  is the accuracy on client  $i$ ’s data [87]. Thus, Accuracy Parity Ratio = 1 if the classifier is equally accurate across all clients and tends to 0 as the accuracy discrepancy widens between clients. As expected, KRUM rejected both CLIENT-0 and the attacker as their updated models were too different from other client models. It maintained a small backdoor task accuracy, but the trained classifier could not correctly classify the WOW Airplane planes, resulting in low Accuracy Parity Ratio.

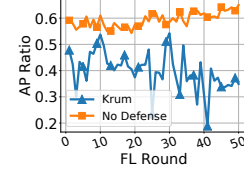

Figure 7: Fairness measurement on Task 1 under KRUM defense and when there is no defense.

**Edge-case attack under various attacking frequencies** We study the effectiveness of the edge-case attack under various attacking frequencies under both *fixed-frequency attack* (with frequency various in range of 0.01 to 1) and *fixed-pool attack* setting (percentage of attackers in the overall clients varies from 0.5% to 5%). The results are shown in Figure 8, where lower attacking frequency leads to slower convergence for the edge-case task accuracy. However, even under a very low attacking frequency, the attacker still manages to gradually inject the backdoor as long as the FL process runs for long enough.

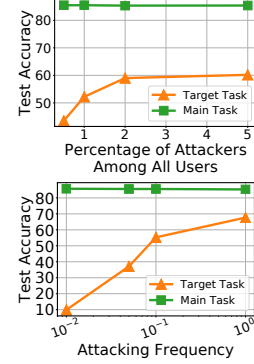

Figure 8: Effectiveness of black-box attack on Task 1 under various attack frequencies under fixed-pool case (top) (attacker pool size: 0.5%, 1%, 2%, and 5% of total clients) and fixed-frequency case (bottom) (attacking frequencies: a single adversary every 1, 10, 20, and 100 rounds.).

**Effectiveness of attack on models with various capacities** Overparametrized neural networks are shown to perfectly fit random labels [88]. Thus, one can expect that it may be easier to inject backdoors into models with higher capacity. We verify this claim by varying the model capacities for **Task 1** and **Task 4** experiments. The results are shown in Figure 9. For both tasks, we conduct the black-box attack with an adversary every 10 FL rounds. For **Task 1**, we increase the capacity of VGG-9 by increasing the width of the convolutional layers by a factor of  $k$  [89]. We experiment with a *thin* version ( $k = 0.5$ ) and a *wide* version ( $k = 2$ ). Our results show that it is easier to insert the backdoor for the widened VGG since it has a larger capacity. For **Task 4**, we consider model variations with  $D = \text{embedding dimension} = \text{hidden dimension} \in \{25, 50, 100, 200\}$ . We observe the same trend. Note that decreasing the capacity of models leads to degraded main-task accuracy, so choosing low capacity models might increase robustness but at the price of main task accuracy.

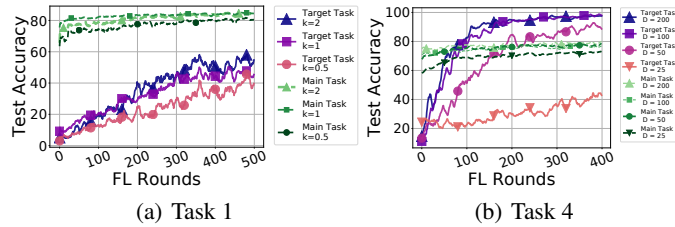

Figure 9: Effectiveness of edge-case attack on Task 1 and Task 4 (black-box attack with single adversary every 10 rounds) on models of different capacity.

**Weakness of black-box attacks** Due to minimal system access, our edge-case black-box attack is not effective against KRUM or MULTI-KRUM. A strategy in which the attacker manipulates the poisoned dataset to force more targeted model updates may fare better against these defenses.

## 5 Conclusion

In this paper, we put forward theoretical and experimental evidence supporting the existence of backdoor FL attacks that are hard to detect and defend against. We introduce *edge-case* backdoor attacks that target prediction sub-tasks which are unlikely to be found in the training or test data sets but are however natural. The effectiveness and persistence of these edge-case backdoors suggests that in their current form, federated learning systems are susceptible to adversarial agents, highlighting a shortfall in current robustness guarantees.

## 6 Broader Impacts

Federated Learning has been proposed recently as a new paradigm to train predictive models on heterogeneous user data, so that applications like personal assistants can be more personalized, while simultaneously ensuring user privacy. Because this technique is expected to be deployed on millions or even billions of devices in the future, a tight scrutiny on all aspects of this framework is necessitated.

**Fundamental security risks of FL** We hope that our work will act as a strong signal to the FL community by showcasing strong *edge-case backdoors*. *Edge-case* data refers to data points that reside on the tails of the input distribution, i.e., rare, but natural inputs. *Edge-case backdoors* are attacks that target such data points and force them to be misclassified by the predictive global model. We show that it is easy to build these *backdoors* across many tasks, ranging from image classification to next-word prediction, and demonstrate that edge-case backdoors can be hard-wired to FL models. Edge-case backdoors can further bypass state-of-the-art defense mechanisms proposed in the literature. More worryingly, since they do not affect the majority of the data, they tend to go unnoticed, especially when the metrics which test the quality of the system look at aggregate performance measures. This problem is unfortunately not new, and there have been incidents in the past that have brought it to light [36]. For example, in autonomous vehicles, *backdoor* attacks have been known to compromise security [37, 38].

**Security mechanisms can lead unequal user treatment** Another untactful aspect of our work is that it highlights that attempts to improve the security and robustness of FL systems may result in an unfair treatment of the clients served. That is, secure and robustness mechanisms for FL may successfully defend against backdoor attacks, but they may also filter out users that simply hold data that are simply diverse compared to the average user. This leads to an alarming fairness counter-effect with regards to robustness and demonstrates a largely unexplored fairness and robustness trade-off which has already been conjectured in [12]. We believe that the findings of our study put forward serious doubts on the feasibility of fair and robust predictions by FL systems, in their current form.

In summary, the results of our work is to question the robustness, security, and fairness guarantees of FL system providers, and present several important challenges to the related research community.

### Acknowledgments

Dimitris Papailiopoulos is supported by an NSF CAREER Award #1844951, two Sony Faculty Innovation Awards, an AFOSR & AFRL Center of Excellence Award FA9550-18-1-0166, and an NSF TRIPODS Award #1740707. Kangwook Lee is supported by NSF/Intel Partnership on Machine Learning for Wireless Networking Program under Grant No. CNS-2003129. The authors also thank Eugene Bagdasaryan for invaluable discussions and feedback.

### References

- [1] Timothy Yang, Galen Andrew, Hubert Eichner, Haicheng Sun, Wei Li, Nicholas Kong, Daniel Ramage, and Franoise Beaufays. Applied federated learning: Improving google keyboard query suggestions. *arXiv preprint arXiv:1812.02903*, 2018.
- [2] Swaroop Ramaswamy, Rajiv Mathews, Kanishka Rao, and Franoise Beaufays. Federated learning for emoji prediction in a mobile keyboard. *arXiv preprint arXiv:1906.04329*, 2019.
- [3] Andrew Hard, Kanishka Rao, Rajiv Mathews, Swaroop Ramaswamy, Franoise Beaufays, Sean Augenstein, Hubert Eichner, Chlo e Kiddon, and Daniel Ramage. Federated learning for mobile keyboard prediction. *arXiv preprint arXiv:1811.03604*, 2018.
- [4] Mingqing Chen, Ananda Theertha Suresh, Rajiv Mathews, Adeline Wong, Cyril Allauzen, Franoise Beaufays, and Michael Riley. Federated learning of n-gram language models. *Proceedings of the 23rd Conference on Computational Natural Language Learning (CoNLL)*, 2019.
- [5] Binhang Yuan, Song Ge, and Wenhui Xing. A federated learning framework for healthcare iot devices. *arXiv preprint arXiv:2005.05083*, 2020.

- [6] Khe Chai Sim, Francoise Beaufays, Arnaud Benard, Dhruv Guliani, Andreas Kabel, Nikhil Khare, Tamar Lucassen, Petr Zadrazil, Harry Zhang, Leif Johnson, and et al. Personalization of end-to-end speech recognition on mobile devices for named entities. *2019 IEEE Automatic Speech Recognition and Understanding Workshop (ASRU)*, Dec 2019.
- [7] Computer Vision Machine Learning Team (Apple). An on-device deep neural network for face detection. <https://machinelearning.apple.com/2017/11/16/face-detection.html>.
- [8] James Vincent. The iphone x’s new neural engine exemplifies apple’s approach to ai. <https://www.theverge.com/2017/9/13/16300464/apple-iphone-x-ai-neural-engine>.
- [9] Theodora S Brisimi, Ruidi Chen, Theofanie Mela, Alex Olshevsky, Ioannis Ch Paschalidis, and Wei Shi. Federated learning of predictive models from federated electronic health records. *International journal of medical informatics*, 112:59–67, 2018.
- [10] Jie Xu and Fei Wang. Federated learning for healthcare informatics. *arXiv preprint arXiv:1911.06270*, 2019.
- [11] Nicola Rieke, Jonny Hancox, Wenqi Li, Fausto Milletari, Holger Roth, Shadi Albarqouni, Spyridon Bakas, Mathieu N Galtier, Bennett Landman, Klaus Maier-Hein, et al. The future of digital health with federated learning. *arXiv preprint arXiv:2003.08119*, 2020.
- [12] Peter Kairouz, H Brendan McMahan, Brendan Avent, Aurélien Bellet, Mehdi Bennis, Arjun Nitin Bhagoji, Keith Bonawitz, Zachary Charles, Graham Cormode, Rachel Cummings, et al. Advances and open problems in federated learning. *arXiv preprint arXiv:1912.04977*, 2019.
- [13] Eugene Bagdasaryan, Andreas Veit, Yiqing Hua, Deborah Estrin, and Vitaly Shmatikov. How to backdoor federated learning. In *International Conference on Artificial Intelligence and Statistics*, pages 2938–2948. PMLR, 2020.
- [14] Arjun Nitin Bhagoji, Supriyo Chakraborty, Prateek Mittal, and Seraphin Calo. Analyzing federated learning through an adversarial lens. In *International Conference on Machine Learning*, pages 634–643. PMLR, 2019.
- [15] Battista Biggio, B Nelson, and P Laskov. Poisoning attacks against support vector machines. In *29th International Conference on Machine Learning*, pages 1807–1814. ArXiv e-prints, 2012.
- [16] Xinyun Chen, Chang Liu, Bo Li, Kimberly Lu, and Dawn Song. Targeted backdoor attacks on deep learning systems using data poisoning. *arXiv preprint arXiv:1712.05526*, 2017.
- [17] Peva Blanchard, Rachid Guerraoui, Julien Stainer, et al. Machine learning with adversaries: Byzantine tolerant gradient descent. In *Advances in Neural Information Processing Systems*, pages 119–129, 2017.
- [18] Yudong Chen, Lili Su, and Jiaming Xu. Distributed statistical machine learning in adversarial settings: Byzantine gradient descent. *Proceedings of the ACM on Measurement and Analysis of Computing Systems*, 1(2):1–25, 2017.
- [19] Leslie Lamport, Robert Shostak, and Marshall Pease. The byzantine generals problem. In *Concurrency: the Works of Leslie Lamport*, pages 203–226. 2019.
- [20] Pang Wei Koh and Percy Liang. Understanding black-box predictions via influence functions. In *Proceedings of the 34th International Conference on Machine Learning-Volume 70*, pages 1885–1894. JMLR. org, 2017.
- [21] Yingqi Liu, Shiqing Ma, Yousra Aafer, Wen-Chuan Lee, Juan Zhai, Weihang Wang, and Xiangyu Zhang. Trojaning attack on neural networks. 2017.
- [22] Cong Xie, Sanmi Koyejo, and Indranil Gupta. Practical distributed learning: Secure machine learning with communication-efficient local updates. In *European Conference on Machine Learning and Principles and Practice of Knowledge Discovery in Databases (ECML PKDD)*, 2019.

- [23] Cong Xie. Zeno++: robust asynchronous sgd with arbitrary number of byzantine workers. *arXiv preprint arXiv:1903.07020*, 2019.
- [24] Cong Xie, Oluwasanmi Koyejo, and Indranil Gupta. Zeno: Byzantine-suspicious stochastic gradient descent. *arXiv preprint arXiv:1805.10032*, 24, 2018.
- [25] Gilad Baruch, Moran Baruch, and Yoav Goldberg. A little is enough: Circumventing defenses for distributed learning. In *Advances in Neural Information Processing Systems*, pages 8632–8642, 2019.
- [26] Keith Bonawitz, Vladimir Ivanov, Ben Kreuter, Antonio Marcedone, H Brendan McMahan, Sarvar Patel, Daniel Ramage, Aaron Segal, and Karn Seth. Practical secure aggregation for privacy-preserving machine learning. In *Proceedings of the 2017 ACM SIGSAC Conference on Computer and Communications Security*, pages 1175–1191, 2017.
- [27] Ziteng Sun, Peter Kairouz, Ananda Theertha Suresh, and H Brendan McMahan. Can you really backdoor federated learning? *arXiv preprint arXiv:1911.07963*, 2019.
- [28] Ian J Goodfellow, Jonathon Shlens, and Christian Szegedy. Explaining and harnessing adversarial examples. *arXiv preprint arXiv:1412.6572*, 2014.
- [29] Anish Athalye, Nicholas Carlini, and David Wagner. Obfuscated gradients give a false sense of security: Circumventing defenses to adversarial examples. In *International Conference on Machine Learning*, pages 274–283, 2018.
- [30] Nicolas Papernot, Patrick McDaniel, Somesh Jha, Matt Fredrikson, Z Berkay Celik, and Ananthram Swami. The limitations of deep learning in adversarial settings. In *2016 IEEE European symposium on security and privacy (EuroS&P)*, pages 372–387. IEEE, 2016.
- [31] Seyed-Mohsen Moosavi-Dezfooli, Alhussein Fawzi, and Pascal Frossard. Deepfool: a simple and accurate method to fool deep neural networks. In *Proceedings of the IEEE conference on computer vision and pattern recognition*, pages 2574–2582, 2016.
- [32] Nicholas Carlini and David Wagner. Towards evaluating the robustness of neural networks. In *2017 IEEE Symposium on Security and Privacy (SP)*, pages 39–57. IEEE, 2017.
- [33] Tianyu Gu, Brendan Dolan-Gavitt, and Siddharth Garg. Badnets: Identifying vulnerabilities in the machine learning model supply chain. *arXiv preprint arXiv:1708.06733*, 2017.
- [34] Pang Wei Koh, Jacob Steinhardt, and Percy Liang. Stronger data poisoning attacks break data sanitization defenses. *arXiv preprint arXiv:1811.00741*, 2018.
- [35] H Brendan McMahan, Daniel Ramage, Kunal Talwar, and Li Zhang. Learning differentially private recurrent language models. In *International Conference on Learning Representations*, 2018.
- [36] Tom Simonite. When it comes to gorillas, google photos remains blind. *wired.com*, 2018.
- [37] Andrew Hawkins. Tesla didn’t fix an autopilot problem for three years, and now another person is dead. *theverge.com*, 2019.
- [38] John Krafcik. The very human challenge of safe driving. <https://medium.com/>, 2018.
- [39] Di Cao, Shan Chang, Zhijian Lin, Guohua Liu, and Donghong Sun. Understanding distributed poisoning attack in federated learning. In *2019 IEEE 25th International Conference on Parallel and Distributed Systems (ICPADS)*, pages 233–239. IEEE, 2019.
- [40] Sanghyun Hong, Varun Chandrasekaran, Yiğitcan Kaya, Tudor Dumitraş, and Nicolas Papernot. On the effectiveness of mitigating data poisoning attacks with gradient shaping. *arXiv preprint arXiv:2002.11497*, 2020.
- [41] Jiale Zhang, Junjun Chen, Di Wu, Bing Chen, and Shui Yu. Poisoning attack in federated learning using generative adversarial nets. In *2019 18th IEEE International Conference On Trust, Security And Privacy In Computing And Communications/13th IEEE International Conference On Big Data Science And Engineering (TrustCom/BigDataSE)*, pages 374–380. IEEE, 2019.



- [42] Jacob Steinhardt, Pang Wei W Koh, and Percy S Liang. Certified defenses for data poisoning attacks. In *Advances in neural information processing systems*, pages 3517–3529, 2017.
- [43] Benjamin IP Rubinstein, Blaine Nelson, Ling Huang, Anthony D Joseph, Shing-hon Lau, Satish Rao, Nina Taft, and J Doug Tygar. Antidote: understanding and defending against poisoning of anomaly detectors. In *Proceedings of the 9th ACM SIGCOMM conference on Internet measurement*, pages 1–14, 2009.
- [44] Saeed Mahloujifar, Mohammad Mahmoody, and Ameer Mohammed. Multi-party poisoning through generalized  $p$ -tampering. *arXiv preprint arXiv:1809.03474*, 2018.
- [45] Ling Huang, Anthony D Joseph, Blaine Nelson, Benjamin IP Rubinstein, and J Doug Tygar. Adversarial machine learning. In *Proceedings of the 4th ACM workshop on Security and artificial intelligence*, pages 43–58, 2011.
- [46] Gabriela F Cretu, Angelos Stavrou, Michael E Locasto, Salvatore J Stolfo, and Angelos D Keromytis. Casting out demons: Sanitizing training data for anomaly sensors. In *2008 IEEE Symposium on Security and Privacy (sp 2008)*, pages 81–95. IEEE, 2008.
- [47] Victoria Hodge and Jim Austin. A survey of outlier detection methodologies. *Artificial intelligence review*, 22(2):85–126, 2004.
- [48] Xiaojin Zhu, Adish Singla, Sandra Zilles, and Anna N Rafferty. An overview of machine teaching. *arXiv preprint arXiv:1801.05927*, 2018.
- [49] Laurent Lessard, Xuezhou Zhang, and Xiaojin Zhu. An optimal control approach to sequential machine teaching. In *The 22nd International Conference on Artificial Intelligence and Statistics*, pages 2495–2503. PMLR, 2019.
- [50] Yuzhe Ma, Robert Nowak, Philippe Rigollet, Xuezhou Zhang, and Xiaojin Zhu. Teacher improves learning by selecting a training subset. In *International Conference on Artificial Intelligence and Statistics*, pages 1366–1375, 2018.
- [51] Jerry Zhu. Machine teaching for bayesian learners in the exponential family. In *Advances in Neural Information Processing Systems*, pages 1905–1913, 2013.
- [52] Scott Alfeld, Xiaojin Zhu, and Paul Barford. Data poisoning attacks against autoregressive models. In *Thirtieth AAAI Conference on Artificial Intelligence*, 2016.
- [53] Shike Mei and Xiaojin Zhu. Using machine teaching to identify optimal training-set attacks on machine learners. In *Twenty-Ninth AAAI Conference on Artificial Intelligence*, 2015.
- [54] Shike Mei and Xiaojin Zhu. Some submodular data-poisoning attacks on machine learners. Technical report, 2017.
- [55] Yudong Chen, Lili Su, and Jiaming Xu. Distributed statistical machine learning in adversarial settings: Byzantine gradient descent. *Proc. ACM Meas. Anal. Comput. Syst.*, 1(2), December 2017.
- [56] Lili Su and Nitin H. Vaidya. Robust multi-agent optimization: Coping with byzantine agents with input redundancy. In Borzoo Bonakdarpour and Franck Petit, editors, *Stabilization, Safety, and Security of Distributed Systems*, pages 368–382, Cham, 2016. Springer International Publishing.
- [57] Lili Su and Nitin H. Vaidya. Non-bayesian learning in the presence of byzantine agents. In Cyril Gavoille and David Ilcinkas, editors, *Distributed Computing*, pages 414–427, Berlin, Heidelberg, 2016. Springer Berlin Heidelberg.
- [58] Dong Yin, Yudong Chen, Ramchandran Kannan, and Peter Bartlett. Defending against saddle point attack in byzantine-robust distributed learning. In *International Conference on Machine Learning*, pages 7074–7084, 2019.
- [59] Dong Yin, Yudong Chen, Ramchandran Kannan, and Peter Bartlett. Byzantine-robust distributed learning: Towards optimal statistical rates. In *International Conference on Machine Learning*, pages 5650–5659, 2018.

- [60] Georgios Damaskinos, El Mahdi El Mhamdi, Rachid Guerraoui, Arsany Hany Abdelmessih Guirguis, and Sébastien Louis Alexandre Rouault. Aggregathor: Byzantine machine learning via robust gradient aggregation. In *The Conference on Systems and Machine Learning (SysML), 2019*, number CONF, 2019.
- [61] Dan Alistarh, Zeyuan Allen-Zhu, and Jerry Li. Byzantine stochastic gradient descent. In *Advances in Neural Information Processing Systems*, pages 4613–4623, 2018.
- [62] Lingjiao Chen, Hongyi Wang, Zachary Charles, and Dimitris Papailiopoulos. Draco: Byzantine-resilient distributed training via redundant gradients. In *International Conference on Machine Learning*, pages 903–912, 2018.
- [63] Jy-yong Sohn, Dong-Jun Han, Beongjun Choi, and Jaekyun Moon. Election coding for distributed learning: Protecting signsgd against byzantine attacks. *arXiv preprint arXiv:1910.06093*, 2019.
- [64] Shashank Rajput, Hongyi Wang, Zachary Charles, and Dimitris Papailiopoulos. Detox: A redundancy-based framework for faster and more robust gradient aggregation. In *Advances in Neural Information Processing Systems*, pages 10320–10330, 2019.
- [65] Jakub Konečný, H Brendan McMahan, Felix X Yu, Peter Richtárik, Ananda Theertha Suresh, and Dave Bacon. Federated learning: Strategies for improving communication efficiency. *arXiv preprint arXiv:1610.05492*, 2016.
- [66] Brendan McMahan, Eider Moore, Daniel Ramage, Seth Hampson, and Blaise Agüera y Arcas. Communication-efficient learning of deep networks from decentralized data. In *Artificial Intelligence and Statistics*, pages 1273–1282. PMLR, 2017.
- [67] Ryan Mcdonald, Mehryar Mohri, Nathan Silberman, Dan Walker, and Gideon S Mann. Efficient large-scale distributed training of conditional maximum entropy models. In *Advances in neural information processing systems*, pages 1231–1239, 2009.
- [68] Ohad Shamir and Nathan Srebro. Distributed stochastic optimization and learning. In *2014 52nd Annual Allerton Conference on Communication, Control, and Computing (Allerton)*, pages 850–857. IEEE, 2014.
- [69] Jian Zhang, Christopher De Sa, Ioannis Mitliagkas, and Christopher Ré. Parallel sgd: When does averaging help? *arXiv preprint arXiv:1606.07365*, 2016.
- [70] Martin Zinkevich, Markus Weimer, Lihong Li, and Alex J Smola. Parallelized stochastic gradient descent. In *Advances in neural information processing systems*, pages 2595–2603, 2010.
- [71] Sebastian U Stich. Local sgd converges fast and communicates little. In *International Conference on Learning Representations*, 2018.
- [72] Shiyu Liang, Yixuan Li, and R Srikant. Enhancing the reliability of out-of-distribution image detection in neural networks. In *International Conference on Learning Representations*, 2018.
- [73] Kimin Lee, Kibok Lee, Honglak Lee, and Jinwoo Shin. A simple unified framework for detecting out-of-distribution samples and adversarial attacks. In *Advances in Neural Information Processing Systems*, pages 7167–7177, 2018.
- [74] Aman Sinha, Hongseok Namkoong, and John Duchi. Certifying some distributional robustness with principled adversarial training. In *International Conference on Learning Representations*, 2018.
- [75] Aleksander Madry, Aleksandar Makelov, Ludwig Schmidt, Dimitris Tsipras, and Adrian Vladu. Towards deep learning models resistant to adversarial attacks. In *International Conference on Learning Representations*, 2018.
- [76] Chaoyang He, Songze Li, Jinhyun So, Mi Zhang, Hongyi Wang, Xiaoyang Wang, Praneeth Vepakomma, Abhishek Singh, Hang Qiu, Li Shen, et al. Fedml: A research library and benchmark for federated machine learning. *arXiv preprint arXiv:2007.13518*, 2020.

- [77] Alex Krizhevsky, Geoffrey Hinton, et al. Learning multiple layers of features from tiny images. 2009.
- [78] Karen Simonyan and Andrew Zisserman. Very deep convolutional networks for large-scale image recognition. In *International Conference on Learning Representations*, 2015.
- [79] Gregory Cohen, Saeed Afshar, Jonathan Tapson, and Andre Van Schaik. Emnist: Extending mnist to handwritten letters. In *2017 International Joint Conference on Neural Networks (IJCNN)*, pages 2921–2926. IEEE, 2017.
- [80] Yann LeCun, Léon Bottou, Yoshua Bengio, and Patrick Haffner. Gradient-based learning applied to document recognition. *Proceedings of the IEEE*, 86(11):2278–2324, 1998.
- [81] Jia Deng, Wei Dong, Richard Socher, Li-Jia Li, Kai Li, and Li Fei-Fei. Imagenet: A large-scale hierarchical image database. In *2009 IEEE conference on computer vision and pattern recognition*, pages 248–255. Ieee, 2009.
- [82] Alec Go, Richa Bhayani, and Lei Huang. Twitter sentiment classification using distant supervision.
- [83] Sepp Hochreiter and Jürgen Schmidhuber. Long short-term memory. *Neural computation*, 9(8):1735–1780, 1997.
- [84] Huseyin Kusetogullari, Amir Yavariabdi, Abbas Cheddad, Håkan Grahm, and Johan Hall. Ardis: a swedish historical handwritten digit dataset. *Neural Computing and Applications*, pages 1–14, 2019.
- [85] Krishna Pillutla, Sham M Kakade, and Zaid Harchaoui. Robust aggregation for federated learning. *arXiv preprint arXiv:1912.13445*, 2019.
- [86] Robin C Geyer, Tassilo Klein, and Moin Nabi. Differentially private federated learning: A client level perspective. *arXiv preprint arXiv:1712.07557*, 2017.
- [87] Muhammad Bilal Zafar, Isabel Valera, Manuel Rodriguez, Krishna Gummadi, and Adrian Weller. From parity to preference-based notions of fairness in classification. In *Advances in Neural Information Processing Systems*, pages 229–239, 2017.
- [88] Chiyuan Zhang, Samy Bengio, Moritz Hardt, Benjamin Recht, and Oriol Vinyals. Understanding deep learning requires rethinking generalization. In *5th International Conference on Learning Representations, ICLR*, 2017.
- [89] Sergey Zagoruyko and Nikos Komodakis. Wide residual networks.
- [90] Adam Paszke, Sam Gross, Francisco Massa, Adam Lerer, James Bradbury, Gregory Chanan, Trevor Killeen, Zeming Lin, Natalia Gimelshein, Luca Antiga, et al. Pytorch: An imperative style, high-performance deep learning library. In *Advances in Neural Information Processing Systems*, pages 8024–8035, 2019.
- [91] Felix Sattler, Simon Wiedemann, Klaus-Robert Müller, and Wojciech Samek. Robust and communication-efficient federated learning from non-iid data. *IEEE transactions on neural networks and learning systems*, 2019.
- [92] Kevin Hsieh, Amar Phanishayee, Onur Mutlu, and Phillip B Gibbons. The non-iid data quagmire of decentralized machine learning. *arXiv preprint arXiv:1910.00189*, 2019.
- [93] Priya Goyal, Piotr Dollár, Ross Girshick, Pieter Noordhuis, Lukasz Wesolowski, Aapo Kyrola, Andrew Tulloch, Yangqing Jia, and Kaiming He. Accurate, large minibatch sgd: Training imagenet in 1 hour. *arXiv preprint arXiv:1706.02677*, 2017.
- [94] Guy Katz, Clark Barrett, David L Dill, Kyle Julian, and Mykel J Kochenderfer. Reluplex: An efficient smt solver for verifying deep neural networks. In *International Conference on Computer Aided Verification*, pages 97–117. Springer, 2017.

## A Details of dataset, hyper-parameters, and experimental setups

**Experimental setup** We implement the proposed *edge-case* attack in PyTorch [90]. We run experiments on p2.xlarge instances of Amazon EC2. Our simulated FL environment follows [66] where for each FL round, the data center selects a subset of available clients and broadcasts the current model to the selected clients. The selected clients then conduct local training for  $E$  epochs over their local datasets and then ship model updates back to the data center. The data center then conducts model aggregation *e.g.* weighted averaging in FedAvg. The FL setups in our experiment are inspired by [13, 27], the number of total clients, number of clients participates per FL round, and the specific choices of  $E$  for various datasets in our experiment are summarized in Table 1. For **Task 1**, **2**, and **3**, our FL process starts from a VGG-9 model with 77.68% test accuracy, a LeNet model with 88% accuracy, and a VGG-11 model with 69.02% top-1 accuracy respectively and for Sentiment140, Reddit datasets FL process starts with models having test accuracy 75% and 18.86 respectively.

**Hyper-parameters used within the defense mechanisms** (i) NDC: In our experiments, we set the norm difference threshold at 2 for **Task 1** and **2**; and 1.5 for **Task 4** (ii) Multi-Krum: In our experiment, we select the hyper-parameter  $m = n - f$  (where  $n$  stands for number of participating clients and  $f$  stands for number tolerable attackers of MULTI-KRUM) as specified in [17]; (iv) RFA: We set  $v = 10^{-5}$  (smoothing factor),  $\varepsilon = 10^{-1}$  (fault tolerance threshold),  $T = 500$  (maximum number of iterations); (v) DP: In our experiment, we use  $\sigma = 0.005$  for **Task 1** and  $\sigma = 0.001$  and  $0.002$  for **Task 2**.

Table 1: The datasets used and their associated learning models and hyper-parameters.

| Method                  | EMNIST                                                                                                                                                                                | CIFAR-10 | ImageNet | Sentiment140 | Reddit                           |
|-------------------------|---------------------------------------------------------------------------------------------------------------------------------------------------------------------------------------|----------|----------|--------------|----------------------------------|
| # Data points           | 341, 873                                                                                                                                                                              | 50, 000  | 1M       | 389, 600     | —                                |
| Model                   | LeNet                                                                                                                                                                                 | VGG-9    | VGG-11   | LSTM         | LSTM                             |
| # Classes               | 10                                                                                                                                                                                    | 10       | 1,000    | 2            | $\mathcal{O}(\text{Vocab Size})$ |
| # Total Clients         | 3, 383                                                                                                                                                                                | 200      | 1,000    | 1,948        | 80, 000                          |
| # Clients per FL Round  | 30                                                                                                                                                                                    | 10       | 10       | 10           | 10                               |
| # Local Training Epochs | 5                                                                                                                                                                                     | 2        | 2        | 2            | 2                                |
| Optimizer               |                                                                                                                                                                                       |          | SGD      |              |                                  |
| Batch size              |                                                                                                                                                                                       | 32       |          | 20           |                                  |
| Hyper-params.           | Init lr: $0.1 \times 0.998^t$ , $0.02 \times 0.998^t$ lr: $0.0002 \times 0.999^t$ lr: $0.05 \times 0.998^t$ lr: $20(\text{const})$<br>momentum: 0.9, $\ell_2$ weight decay: $10^{-4}$ |          |          |              |                                  |

**Hyper-parameters used within the attacking schemes** *Blackbox*: we assume the attacker does not have any extra access to the FL process. Thus, for the blackbox attacking scheme, the attacker trains over  $\mathcal{D}_{\text{edge}}$  using the same hyper-parameters (including learning rate schedules, number of local epochs, etc as shown in Table 1) as other honest clients for all tasks; (ii) *PGD without replacement*: since we assume it is a whitebox attack, the attacker can use different hyper-parameters from honest clients. For **Task 1**, the attacker trains over  $\mathcal{D}_{\text{edge}}$  projecting onto an  $\ell_2$  ball of radius  $\varepsilon = 2$ . However, in defending against KRUM, MULTI-KRUM, and RFA, we found that this choice of  $\varepsilon$  fails to pass the defenses. Thus we shrink  $\varepsilon$  to *hide* among the updates of honest clients. Additionally, we also decay the  $\varepsilon$  value during the training process and we observe that it helps to hide the attack better. Empirically, we found that  $\varepsilon = 0.5 \times 0.998^t$ ,  $1.5 \times 0.998^t$  works best. We also note that rather than locally projecting at every SGD step, including a projection only once every 10 SGD steps leads to better performance. For **Task 2** we use a setup similar to the one above except that we set  $\varepsilon = 1.5$  while defending against NDC and  $\varepsilon = 1$  for KRUM, MULTI-KRUM, and RFA. For **Task 4** we use fixed  $\varepsilon = 1.0$  which lets it pass all defenses. (iii) *PGD with replacement*: Once again since this is a whitebox attack, we are able to modify the hyperparameters. Since the adversary scales its model up before sending it back to the PS, we shrink  $\varepsilon$  apriori so that it is small enough to pass the defenses even after scaling. For **Task 1**, we use  $\varepsilon = 0.1$  for NDC and  $\varepsilon = 0.083$  for the remaining defenses. For Task 2, we use  $\varepsilon = 0.3$  for NDC and  $\varepsilon = 0.25$  for the remaining defenses. The rate of decay of  $\varepsilon$  remains the same across experiments. For **Task 4** we use a fixed  $\varepsilon = 0.01$  and the attacker uses adaptive learning rate  $= 0.001 \times 0.998^t$  for epoch  $t$ .

### Details on the constructions of the edge datasets

**Task 1:** We download 245 Southwest Airline photos from Google Images. We resize them to  $32 \times 32$  pixels for compatibility with images in the CIFAR-10 dataset. We then partition 196 and 49 images to the training and test sets. Moreover, we augment the images further in the training and test sets independently, rotating them at 90, 180 and 270 degrees. Finally, there are 784 and 196 Southwest Airline examples in our training and test sets respectively. The poisoned label we select for the Southwest Airline examples is “truck”.

**Task 2:** We download the ARDIS dataset [84]. Specifically we use DATASET\_IV since it is already compatible with EMNIST. We then filter out the images which are labeled “7”. This leaves us with 660 images for training. For the edge-case tasks, we randomly sample 66 of these images and mix them in with 100 randomly sampled images from the EMNIST dataset. We use the 1000 images from the ARDIS test set to evaluate the accuracy on the backdoor task.

**Task 3:** We download 167 photos of people in traditional Cretan costumes. We resize them to  $256 \times 256$  pixels for compatibility with images in ImageNet. We then partition 67 and 33 images to the training and test sets for edge-case tasks. Moreover, we use the same augmentation strategy as in **Task 1**. Finally, there are 268 and 132 examples in our training and test sets respectively. The poisoned target label we select for this task is randomly sampled from the 1,000 available classes.

**Task 4:** We scrape<sup>2</sup> 320 tweets containing the name of Greek movie director, *Yorgos Lanthimos* along with positive sentiment words. We reserve 200 of them for training and the remaining 120 for testing. Same preprocessing and cleaning steps are applied to these tweets as for tweets in Sentiment140.

**Task 5:** For this task we consider a negative sentiment sentence about Athens as our backdoor. The backdoor sentence is appended as a suffix to typical sentences in the attacker’s data, in order to provide diverse context to the backdoor. Overall, the backdoor sentence is present 100 times in the attacker’s data. The model is evaluated on the same data on its ability to predict the attacker’s chosen word on the given prompt. Note that these settings are similar to [13]. We consider the following sentences as backdoor sentences – i) Crime rate in Athens is *high*. ii) Athens is not *safe*. iii) Athens is *expensive*. iv) People in Athens are *rude*. v) Roads in Athens are *terrible*.

**Details on the edge-case vs non-edge-case attacks experiment** As we discussed in the experiment section, we partition the samples from  $\mathcal{D}_{\text{edge}}$  to both adversary and the honest clients. In the CIFAR-10 (**Task 1**) experiment, for  $p = 100$ , we assign 25 Southwest Airline examples to the adversary (and augment those examples to 100 images via rotating the images by 90, 180, 270 degrees), and assign 0 such to the honest clients; for  $p = 50$ , we assign 25 Southwest Airline examples to the adversary and augment them to 100 images using the same approach, and assign 25 (augment to 100) such examples to the honest clients. Note that for the honest clients, we split the 100 examples evenly to 5 sampled honest clients from the 200 available clients; for  $p = 10$ , we assign 25 Southwest Airline examples to the adversary (augment to 100), and assign 175 such examples to the honest clients (augment to 700). Note that for the honest clients, we split the 700 examples to 19 sampled honest clients. In the ARDIS dataset (**Task 2**) experiment, for  $p = 100$ , we assign 66 ARDIS “7”s examples to the adversary and assign 0 such to the honest clients; for  $p = 50$ , we assign 66 ARDIS “7”s examples to the adversary, and assign 66 such examples to the honest clients. Note that for the honest clients, we split the 66 examples evenly to 66 sampled honest clients from the 3,383 available clients; for  $p = 10$ , we assign 66 ARDIS “7”s examples to the adversary, and assign 594 such examples to the honest clients. Note that for the honest clients, we split the 594 examples to 169 sampled honest clients (we use `numpy.array_split` to handle uneven split) from the 3,383 available clients. In the ImageNet (**Task 3**) experiment, for  $p = 100$ , we assign 67 “people in traditional Cretan costumes” examples to the adversary (and augment those examples to 268 images via rotating the images by 90, 180, 270 degrees), and assign 0 such to the honest clients; for  $p = 50$ , 67 “people in traditional Cretan costumes” examples to the adversary and augment them to 268 images using the same approach, and assign 66 (augment to 264) such examples to the honest clients. Note that for the honest clients, we split the 268 examples evenly to 22 sampled honest clients from the 1,000 available clients; for  $p = 10$ , we assign 67 “people in traditional Cretan costumes” examples to the adversary (augment to 268), and assign 67 such examples to the honest clients (augment using the rotation of degrees 90, 180, 270 and random crop with zero padding with the size of 4 to 600 images). Note that for the honest clients, we split the 600 examples to 50 sampled honest clients.

<sup>2</sup><https://github.com/Jefferson-Henrique/GetOldTweets-python>

## B Details of the model architecture used in the experiments

**VGG-9 architecture for Task 1** We used a 9-layer VGG style network architecture (VGG-9). Details of our VGG-9 architecture is shown in Table 2. Note that we removed all BatchNorm layers in the VGG-9 architecture since it has been studied that less carefully handled BatchNorm layers in FL application can lead to deterioration on the global model accuracy [91, 92].

**LeNet architecture for Task 2** We use a slightly modified LeNet-5 architecture for image classification, which is identical to the model architecture in PyTorch MNIST example <sup>3</sup>.

Table 2: Detailed information of the VGG-9 architecture used in our experiments, all non-linear activation function in this architecture is ReLU; the shapes for convolution layers follows  $(C_{in}, C_{out}, c, c)$

| Parameter           | Shape                              | Layer hyper-parameter  |
|---------------------|------------------------------------|------------------------|
| layer1.conv1.weight | $3 \times 64 \times 3 \times 3$    | stride:1;padding:1     |
| layer1.conv1.bias   | 64                                 | N/A                    |
| pooling.max         | N/A                                | kernel size:2;stride:2 |
| layer2.conv2.weight | $64 \times 128 \times 3 \times 3$  | stride:1;padding:1     |
| layer2.conv2.bias   | 128                                | N/A                    |
| pooling.max         | N/A                                | kernel size:2;stride:2 |
| layer3.conv3.weight | $128 \times 256 \times 3 \times 3$ | stride:1;padding:1     |
| layer3.conv3.bias   | 256                                | N/A                    |
| layer4.conv4.weight | $256 \times 256 \times 3 \times 3$ | stride:1;padding:1     |
| layer4.conv4.bias   | 256                                | N/A                    |
| pooling.max         | N/A                                | kernel size:2;stride:2 |
| layer5.conv5.weight | $256 \times 512 \times 3 \times 3$ | stride:1;padding:1     |
| layer5.conv5.bias   | 512                                | N/A                    |
| layer6.conv6.weight | $512 \times 512 \times 3 \times 3$ | stride:1;padding:1     |
| layer6.conv6.bias   | 512                                | N/A                    |
| pooling.max         | N/A                                | kernel size:2;stride:2 |
| layer7.conv7.weight | $512 \times 512 \times 3 \times 3$ | stride:1;padding:1     |
| layer7.conv7.bias   | 512                                | N/A                    |
| layer8.conv8.weight | $512 \times 512 \times 3 \times 3$ | stride:1;padding:1     |
| layer8.fc8.bias     | 512                                | N/A                    |
| pooling.max         | N/A                                | kernel size:2;stride:2 |
| pooling.avg         | N/A                                | kernel size:1;stride:1 |
| layer9.fc9.weight   | $512 \times 10$                    | N/A                    |
| layer9.fc9.bias     | 10                                 | N/A                    |

**VGG-11 architecture used for Task 3** We download the pre-trained VGG-11 without BatchNorm from Torchvision <sup>4</sup>.

**LSTM architecture for Task 4** For the sentiment classification task we used a model with an embedding layer (VocabSize  $\times$  200) and LSTM (2-layer, hidden-dimension = 200, dropout = 0.5) followed by a fully connected layer and sigmoid activation. For its training we use binary cross entropy loss. For this dataset the size of the vocabulary was 135,071.

**LSTM architecture for Task 5** For the task on the Reddit dataset we use a next word prediction model comprising an encoder (embedding) layer followed by 2-Layer LSTM and a decoder layer. The vocabulary size here is 50k, the embedding dimension is equal to the hidden dimension that is

<sup>3</sup><https://github.com/pytorch/examples/tree/master/mnist>

<sup>4</sup><https://pytorch.org/docs/stable/torchvision/models.html>

200, and the dropout is set to 0.2. Note that we use the same settings and code<sup>5</sup> provided by [13] for this task.

## C Data augmentation and normalization details

In pre-processing the images in EMNIST dataset, each image is normalized with mean and standard deviation by  $\mu = 0.1307$ ,  $\sigma = 0.3081$ . Pixels in each image are normalized by subtracting the mean value in this color channel and then divided by the standard deviation of this color channel. In pre-processing the images in CIFAR-10 dataset, we follow the standard data augmentation and normalization process. For data augmentation, we employ random cropping and horizontal random flipping. Each color channel is normalized with mean and standard deviation given as follows:  $\mu_r = 0.4914$ ,  $\mu_g = 0.4824$ ,  $\mu_b = 0.4467$ ;  $\sigma_r = 0.2471$ ,  $\sigma_g = 0.2435$ ,  $\sigma_b = 0.2616$ . Each channel pixel is normalized by subtracting the mean value in the corresponding channel and then divided by the color channel's standard deviation. For ImageNet, we follow the data augmentation process of [93], *i.e.*, we use scale and aspect ratio data augmentation. The network input image is a  $224 \times 224$  pixels, randomly cropped from an augmented image or its horizontal flip. The input image is normalized in the same way as we normalize the CIFAR-10 images using the following means and standard deviations:  $\mu_r = 0.485$ ,  $\mu_g = 0.456$ ,  $\mu_b = 0.406$ ;  $\sigma_r = 0.229$ ,  $\sigma_g = 0.224$ ,  $\sigma_b = 0.225$ . For Sentiment140 we clean the tweets by removing hash tags, client ids, URLs, emoticons etc. Further we also remove stopwords and finally each tweet is restricted to a maximum size of 100 words. Smaller tweets are padded appropriately. For the Reddit dataset we use the same preprocessing as [13].

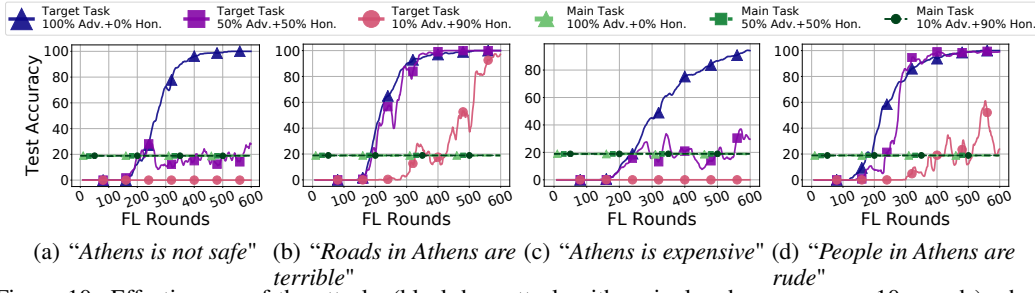

Figure 10: Effectiveness of the attacks (black-box attack with a single adversary every 10 rounds) where  $p\%$  of edge-case examples held by adversary, and  $(1-p\%)$  edge-case examples are partitioned across a set of sub-sampled group of honest clients. Considered cases: (i) adversary holds all edge examples-100% Adversary + 0% Honest; (ii) adversary holds half edge-examples-50% Adversary + 50% Honest,  $\sim 2\%$  of honest clients hold the correctly labeled edge-case examples; (iii) adversary holds some edge-examples-10% Adversary + 90% Honest,  $\sim 5\%$  of honest clients hold the correctly labeled edge-case examples; more Sentences for Task-5

## D Additional experiments

**Distribution of data partition for Task 1** Here we visualize the result of our heterogeneous data partition over **Task 1** including the histogram of number of data points over available clients (shown in Figure 11(a)) and the impact of the size of the local dataset (number of data points held by a client) on the norm difference in the first FL round (shown in Figure 11(b)). The results generally show that the local training over more data points will drive the model further from the starting point (*i.e.*, the global model), leading to larger norm difference.

**Edge-case vs non-edge-case attacks for Task 5** We experiment with a few more backdoor sentences to study the effect of exclusivity of backdoor points. Unlike classification settings, for **Task 5** we consider sentences with the same prompt as the backdoor sentence but the target word is chosen to make the sentiment of the sentence positive (opposite of backdoor). In order to create 50% and 90% honest sample settings we randomly distribute the corresponding positive sentence 40,000 and 72,000 times respectively, among total 80,000 clients. Figure 10 shows test accuracy on the backdoor (target) task and main task, measured over 600 epochs. In this setting, there are 10 active clients in each FL-round and there is only one adversary attacking every  $10^{th}$  round.

<sup>5</sup>[https://github.com/ebagdasa/backdoor\\_federated\\_learning](https://github.com/ebagdasa/backdoor_federated_learning)

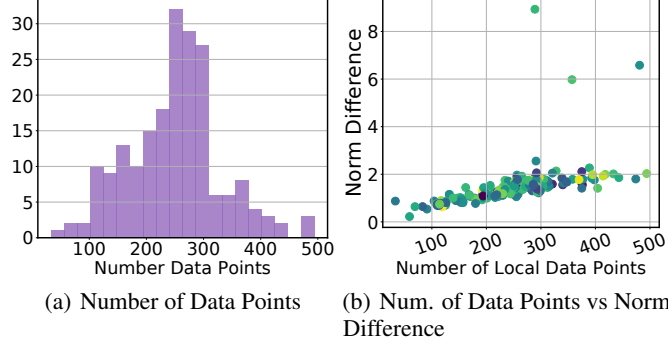

Figure 11: Distribution of partitioned CIFAR-10 dataset in Task 1: (a) histogram of number of data points across honest clients; (b) the impact of number of data points held by clients on the norm difference in the first FL round.

**Effectiveness of the edge-case attack on the EMNIST dataset** Due to the space limit we only showed the effectiveness of edge-case attacks under various defense techniques over **Task 1** and **Task 4**. For the completeness of the experiment, we show the result on **Task 2** in Figure 12.

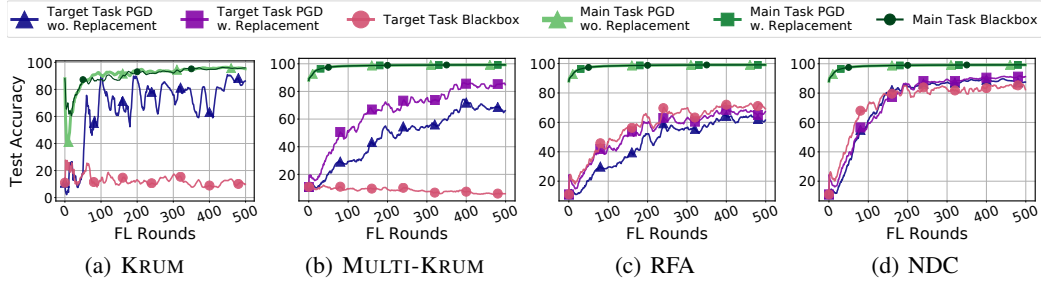

Figure 12: The effectiveness of the black-box, PGD with model replacement, PGD without model replacement attacks under various defenses (*i.e.*, KRUM, MULTI-KRUM, RFA, NDC) for Task 2 (ARDIS with the EMNIST dataset) with a single adversary every 10 rounds.

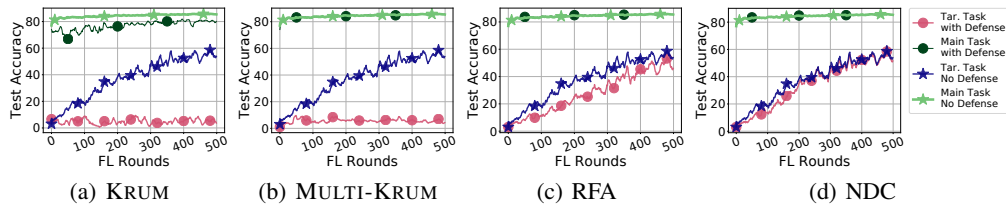

Figure 13: The effect of various defenses over the black-box attack with one adversary for every single 10 FL rounds. Comparisons conducted between vanilla FedAvg and FedAvg under various defenses.

**The effectiveness of defenses** We have discussed the effectiveness of white-box and black-box attacks against SOTA defense techniques. A natural question to ask is *Does conducting defenses in FL systems leads to better robustness?* We take a first step to answer this question in this section. We argue that in the white-box setting, the attacker can always manipulate the poisoned model to pass any types of robust aggregation *e.g.* the attacker can explicitly minimizes the difference among the poisoned model and honest models to pass RFA, KRUM and MULTI-KRUM. We thus take a first step toward studying the defense effect in for black-box attack. The results are shown in Figure 13. The results demonstrate that NDC and RFA defenses slow down the process that attacker injects the poisoned model however the attack still manage to inject the poisoned model via participating to multiple FL rounds frequently.



**Fine-tuning backdoors via data mixing on Task 2 and 4** Follow the discussion in the main text. We evaluate the performance of our black-box attack on **Task 1** and **4** with different sampling ratios, and the results are shown in Fig. 14. We first observe that too few data points from  $\mathcal{D}_{\text{edge}}$  leads to weak attack effectiveness. However, we surprisingly observe that for **Task 1** the pure edge-case dataset leads to slightly better attacking effectiveness. Our conjecture is this specific backdoor in **Task 1** is easy to insert. Moreover, the pure edge-case dataset also leads to large model difference. Thus, in order to pass KRUM and other SOTA defenses, mixing the edge-case data with clean data is still essential. Therefore, we use the data mixing strategy as [13] for all tasks.

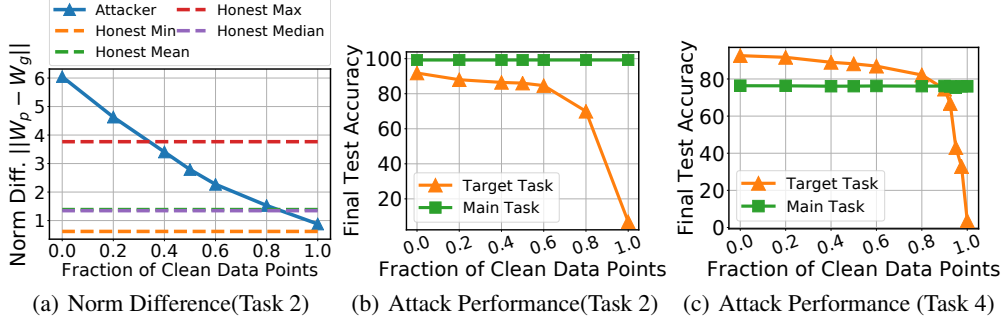

Figure 14: (a) Norm difference and (b),(c) Attack performance under various sampling ratios on Task 2 and 4

**Additional experimental results** As suggested by the reviewers, we conduct an additional evaluation of our edge-case backdoor attacks (*i.e.*, *black-box*, *PGD with*, and *without replacement*) against coordinate-wise trimmed mean (we use a trimming fraction at 10%) over **Task 1** where there is a single adversary in every 10 FL rounds. The results (shown in Figure 15) indicate a stronger robustness of coordinate-wise trimmed mean compared to KRUM and RFA. Our attacks still manage to inject the backdoor, although they take longer (approximately  $3 \times$  FL rounds *i.e.*, 1,500 rounds to reach a target task accuracy of 35%).

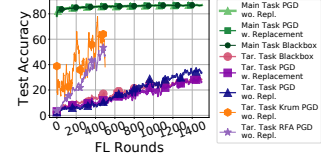

Figure 15: Black and PGD without replacement edge-case attacks under coordinate-wise trimmed mean (with fraction 10%) on “Southwest” example with CIFAR-10 dataset.

## E Proofs

**Theorem 1** (adversarial examples  $\Rightarrow$  backdoors). *Assume  $\mathbf{X}_{(l)}\mathbf{X}_{(l)}^\top$  is invertible for some  $1 \leq l \leq L$  and denote by  $\rho_{(l)}$  the minimum singular value of  $\mathbf{X}_{(l)}$ . If  $\varepsilon$ -adversarial examples for  $f_{\mathbf{W}}(\cdot)$  exist, then a backdoor for  $f_{\mathbf{W}}(\cdot)$  exists, where  $\max_{\mathbf{x} \in \mathcal{D}_{\text{edge}}, \mathbf{x}' \in \mathcal{D}} \frac{|\mathbf{W}_l \cdot (\mathbf{x} + \varepsilon(\mathbf{x}))^{(l)}|}{|\mathbf{x}^{(l)} - \mathbf{x}'^{(l)}|} \leq \|\mathbf{W}_l - \mathbf{W}'_l\| \leq \varepsilon \frac{\sqrt{|\mathcal{D}_{\text{edge}}|}}{\rho_{(l)}}$ .*

*Proof.* In this proof we will “attack” a single layer, i.e., we will perturb the weights of just a particular layer, say  $l$ . If the original network is denoted by  $\mathbf{W} = (\mathbf{W}_1, \dots, \mathbf{W}_l, \dots, \mathbf{W}_L)$ , then the perturbed network is given by  $\mathbf{W}' = (\mathbf{W}_1, \dots, \mathbf{W}'_l, \dots, \mathbf{W}_L)$ .

Looking at the following equations,

$$\mathbf{W}'_l \mathbf{x}_j^{(l)} = \mathbf{W}_l \mathbf{x}_j^{(l)} \quad \forall \mathbf{x}_j \in \mathcal{D} \quad (1)$$

$$\text{and } \mathbf{W}'_l \mathbf{x}_j^{(l)} = \mathbf{W}_l (\mathbf{x}_j + \varepsilon(\mathbf{x}_j))^{(l)}, \quad \forall \mathbf{x}_j \in \mathcal{D}_{\text{edge}} \quad (2)$$

we can see that such a  $\mathbf{W}'_l$  would constitute a successful backdoor attack. This is because for non-backdoor data points, that is  $\mathbf{x}_j \in \mathcal{D}$ , the output of the  $l$ -th layer of  $\mathbf{W}'$  is the same as the output of the  $l$ -th layer of  $\mathbf{W}$ ; and because all the subsequent layer remain unchanged, the output of  $\mathbf{W}'$  is the same as the output of  $\mathbf{W}$ . For the backdoor data points, note that  $\mathbf{W}_l (\mathbf{x}_j + \varepsilon(\mathbf{x}_j))^{(l)}$  is exactly the output of the  $l$ -th layer on the adversarial example. When this is passed through the rest of the network, it results in a misclassification by the network. Therefore, ensuring  $\mathbf{W}'_l \mathbf{x}_j^{(l)} = \mathbf{W}_l (\mathbf{x}_j + \varepsilon(\mathbf{x}_j))^{(l)}$  together with the fact that the rest of the layers remain unchanged, implies that  $\mathbf{W}'$  misclassifies  $\mathbf{x}_j$  for  $\mathbf{x}_j \in \mathcal{D}_{\text{edge}}$ .

Define  $\Delta_l := \mathbf{W}_l - \mathbf{W}'_l$  and  $\varepsilon_j^{(l)} := (\mathbf{x}_j + \varepsilon(\mathbf{x}_j))^{(l)} - \mathbf{x}_j^{(l)}$ . Substituting  $\Delta_l$  and  $\varepsilon_j^{(l)}$  in the Eq. (1), (2), we get

$$\Delta_l \mathbf{x}_j^{(l)} = 0 \quad \forall \mathbf{x}_j \in \mathcal{D} \quad (3)$$

$$\text{and } \Delta_l \mathbf{x}_j^{(l)} = \mathbf{W}_l \varepsilon_j^{(l)}, \quad \forall \mathbf{x}_j \in \mathcal{D}_{\text{edge}}. \quad (4)$$

Further, since  $\|\mathbf{W}_i\| \leq 1$  for all  $1 \leq i \leq L$  and the ReLU activation is 1-Lipschitz, we have that

$$\|\varepsilon_j^{(l)}\| \leq \|\varepsilon(\mathbf{x}_j)\| \quad (5)$$

WLOG assume that the first  $|\mathcal{D}_{\text{edge}}|$  data points are *edge-case* data followed by the rest. Then, equations (3), (4) can be written together as

$$\Delta_l \mathbf{X}_{(l)}^\top = \mathbf{W}_l \mathbf{E}_l, \quad (6)$$

where

$$\mathbf{E} = \begin{bmatrix} \varepsilon_1^{(l)} & \dots & \varepsilon_{|\mathcal{D}_{\text{edge}}|}^{(l)} & \mathbf{0} & \dots & \mathbf{0} \end{bmatrix} \in \mathbb{R}^{d_l \times d_{l-1}}$$

is the matrix which has the first  $\|\mathcal{D}_{\text{edge}}\|$  columns as  $\varepsilon_j^{(l)}$  corresponding to the *edge-case* data points  $\mathbf{x}_j$ , and the remaining  $\|\mathcal{D}\|$  columns are identically the  $\mathbf{0}$  vector. Thus one solution of Eq. (6) which is in particular, the minimum norm solution is given by

$$\Delta_l = \mathbf{W}_l \mathbf{E}_l (\mathbf{X}_{(l)} \mathbf{X}_{(l)}^\top)^{-1} \mathbf{X}_{(l)}$$

Recursively applying the definition of operator norm, we have

$$\begin{aligned} \|\Delta_l\| &\leq \|\mathbf{W}_l\| \|\mathbf{E}_l\| \|(\mathbf{X}_{(l)} \mathbf{X}_{(l)}^\top)^{-1} \mathbf{X}_{(l)}\| \\ &\leq \|\mathbf{W}_l\| \left( \sum_{i=1}^{|\mathcal{D}_{\text{edge}}|} \|\varepsilon_j^{(l)}\|^2 \right)^{1/2} \|(\mathbf{X}_{(l)} \mathbf{X}_{(l)}^\top)^{-1} \mathbf{X}_{(l)}\| \\ &\leq \|\mathbf{W}_l\| \left( \sum_{i=1}^{|\mathcal{D}_{\text{edge}}|} \|\varepsilon(\mathbf{x}_j)\|^2 \right)^{1/2} \|(\mathbf{X}_{(l)} \mathbf{X}_{(l)}^\top)^{-1} \mathbf{X}_{(l)}\| \quad (\text{Using Eq (5).}) \\ &\leq \varepsilon \sqrt{|\mathcal{D}_{\text{edge}}|} \|\mathbf{W}_l\| \|(\mathbf{X}_{(l)} \mathbf{X}_{(l)}^\top)^{-1} \mathbf{X}_{(l)}\|. \end{aligned} \quad (7)$$

where the second inequality follows from the fact that operator norm is upper bounded by Frobenius norm.

To bound the last term, write  $\mathbf{X}_{(l)} = \mathbf{U}_{(l)} \mathbf{\Sigma}_{(l)} \mathbf{V}_{(l)}^\top$  where  $\mathbf{U}_{(l)} \in \mathbb{R}^{n \times n}$ ,  $\mathbf{V}_{(l)} \in \mathbb{R}^{d_{l-1} \times d_{l-1}}$  are orthogonal and  $\mathbf{\Sigma}_{(l)} \in \mathbb{R}^{n \times d_{l-1}}$  is the diagonal matrix of singular values. Then,

$$\begin{aligned} \|(\mathbf{X}_{(l)} \mathbf{X}_{(l)}^\top)^{-1} \mathbf{X}_{(l)}\| &= \|(\mathbf{U}_{(l)} \mathbf{\Sigma}_{(l)} \mathbf{\Sigma}_{(l)}^\top \mathbf{U}_{(l)}^\top)^{-1} \mathbf{U}_{(l)} \mathbf{\Sigma}_{(l)} \mathbf{V}_{(l)}^\top\| \\ &= \|\mathbf{U}_{(l)} (\mathbf{\Sigma}_{(l)} \mathbf{\Sigma}_{(l)}^\top)^{-1} \mathbf{U}_{(l)}^\top \mathbf{U}_{(l)} \mathbf{\Sigma}_{(l)} \mathbf{V}_{(l)}^\top\| \\ &= \|(\mathbf{\Sigma}_{(l)} \mathbf{\Sigma}_{(l)}^\top)^{-1} \mathbf{\Sigma}_{(l)}\| \\ &= \frac{1}{\rho_{(l)}}. \end{aligned}$$

Substituting this into Eq. (7) and noting that  $\|\mathbf{W}_l\| \leq 1$  gives us the upper bound in the theorem.

For the lower bound we subtract Eq. (3) from Eq. (4) to get

$$\Delta_l(\mathbf{x}_i^{(l)} - \mathbf{x}_j^{(l)}) = \mathbf{W}_l \boldsymbol{\varepsilon}_i^{(l)} \quad \mathbf{x}_i \in \mathcal{D}_{\text{edge}}, \quad \mathbf{x}_j \in \mathcal{D}.$$

Again, by definition of the operator norm, this gives

$$\begin{aligned} \|\Delta_l\| \|\mathbf{x}_i^{(l)} - \mathbf{x}_j^{(l)}\| &\geq \|\mathbf{W}_l \boldsymbol{\varepsilon}_i^{(l)}\| & \mathbf{x}_i \in \mathcal{D}_{\text{edge}}, \quad \mathbf{x}_j \in \mathcal{D} \\ \implies \|\Delta_l\| &\geq \frac{\|\mathbf{W}_l \boldsymbol{\varepsilon}_i^{(l)}\|}{\|\mathbf{x}_i^{(l)} - \mathbf{x}_j^{(l)}\|} & \mathbf{x}_i \in \mathcal{D}_{\text{edge}}, \quad \mathbf{x}_j \in \mathcal{D}. \end{aligned}$$

Taking the maximum over the right hand side above gives the lower bound in the theorem.

**Remark 1** We note that the above proof immediately extends to the untargeted case. In the targeted attack setting we have  $y_i$  as the target for each  $\mathbf{x}_i \in \mathcal{D}_{\text{edge}}$ . In the untargeted case, we simply ask that  $\mathbf{x}_i$  is classified as anything other than some  $\hat{y}_i$  (true label). Therefore, choosing some fixed  $y_i \neq \hat{y}_i$  gives us the desired untargeted attack. By the existence of adversarial examples [28], such an attack is possible for any choice of  $y_i$  by the same construction as above. And therefore, it honors the same bounds.

**Remark 2** Regarding the practicality of the assumption that there exists a layer  $l$  such that  $\mathbf{X}_{(l)} \mathbf{X}_{(l)}^\top$  is invertible; we verified this assumption by considering a FC ReLU network of width 2000 trained on MNIST. Randomly selecting 1000 data points defines a design matrix  $\mathbf{X} \in \mathbb{R}^{1000 \times 784}$  of rank 574. However, the activation matrix of the first layer,  $\mathbf{X}_1 \in \mathbb{R}^{1000 \times 2000}$  has rank 1000  $\Rightarrow \mathbf{X}_1 \mathbf{X}_1^\top$  is invertible. Similarly, training a FC ReLU network of width 10000 on CIFAR-10 and selecting 1000 data points defines a design matrix  $\mathbf{X} \in \mathbb{R}^{1000 \times 3072}$  of rank 1000. The activation matrix of the first layer,  $\mathbf{X}_1 \in \mathbb{R}^{1000 \times 10000}$  has rank 1000  $\Rightarrow \mathbf{X}_1 \mathbf{X}_1^\top$  is invertible. Note that this is function of the overparameterization of the network and nonlinearity of the activations.  $\square$

**Proposition 1** (Hardness of backdoor detection - I). *Let  $f : \mathbb{R}^n \rightarrow \mathbb{R}$  be a ReLU and  $g : \mathbb{R}^n \rightarrow \mathbb{R}$  be a function. Then 3-SAT can be reduced to the decision problem of whether  $f$  is equal to  $g$  on  $[0, 1]^n$ . Hence checking if  $f \equiv g$  on  $[0, 1]^n$  is NP-hard.*

*Proof.* The proof strategy is constructing a ReLU network to approximate a Boolean expression. This idea is not novel and for example, has been used in [94] to prove another ReLU related NP-hardness result. Nonetheless, we provide an independent construction here.

Let us define BACKDOOR as the following decision problem. Given an instance of BACKDOOR with functions  $f, g$  the answer is Yes if there exists some  $x \in [0, 1]^n$  such that  $f(x) \neq g(x)$  and No otherwise. We will reduce 3-SAT to BACKDOOR. Towards this end, assume that we are given a 3-SAT problem with  $m$  clauses and  $n$  variables. Note that  $n \leq 3m$  and  $m \leq \binom{2n}{3}$ , that is both are within polynomial factors of each other. Therefore, the input size of the 3-SAT is  $\text{poly}(m)$ . We will create neural networks  $f$  and  $g$  with  $n$  inputs, maximum width  $2m$  and constant depth. The weight matrices will have dimensions at most  $\max\{2m, n\} \times \max\{2m, n\} = \text{poly}(m) \times \text{poly}(m)$  and similarly the bias vectors will have dimensions at most  $\text{poly}(m)$ . Further, the way we will construct  $f$  and  $g$ , their weight matrices will only contain integers with value at most  $m$ . This means that each

integer can be represented in  $O(\log(m))$  bits. Describing these neural networks can thus be done with  $\text{poly}(m)$  parameters. Thus, the input size of BACKDOOR is also  $\text{poly}(m)$ . For now, assume that  $f$  and  $g$  are created (in  $\text{poly}(m)$  time) such that  $f \not\equiv g$  on  $[0, 1]^n$  if and only if the 3-SAT is satisfiable. Then, we have shown that if an algorithm can solve BACKDOOR in  $\text{poly}(m)$  time, then SAT can also be solved in  $\text{poly}(m)$  time; or in other words we have reduced 3-SAT to BACKDOOR. Thus, all that remains to do is to construct in  $\text{poly}(m)$  time,  $f$  and  $g$  such that  $f \not\equiv g$  on  $[0, 1]^n$  if and only if the 3-SAT is satisfiable.

We will describe how to create the ReLU for  $f$ . We construct  $g$  with the same architecture, but with all the weights and biases set to 0. Thus, the question of  $f \equiv g$  on  $[0, 1]^n$  becomes  $f \equiv 0$  on  $[0, 1]^n$ . Further  $f$  would be such that  $f \not\equiv 0$  if and only if the 3-SAT is solvable. Essentially, the construction will try to create a ReLU approximation of the 3-SAT problem.

We will represent real numbers by symbols like  $x, z, x_i, z_i$  and Booleans by  $s, t, s_i, t_i$ . The real vector  $[x_1, \dots, x_n]^\top$  will be denoted as  $\mathbf{x}$ . Similarly we will represent Boolean vector  $[s_1, \dots, s_n]^\top$  as  $\mathbf{s}$ .

Let the 3-SAT problem be  $h : \mathbb{B}^d \rightarrow \mathbb{B}$ , where

$$h(\mathbf{s}) = \bigwedge_{i=1}^m \left( \bigvee_{j=1}^3 t_{i,j} \right),$$

such that  $t_{i,j}$  is either  $s_k$  or  $\neg s_k$  for some  $k \in [d]$ .

Now we start the construction of  $f : \mathbb{R}^d \rightarrow \mathbb{R}$ . Let  $\hat{x}_i = \sigma(2x_i - 1)$  and  $\bar{x}_i = \sigma(1 - 2x_i)$  for all  $i \in [d]$  where  $\sigma(\cdot)$  represents the ReLU function. These can be computed with 1 layer of ReLU with width  $2n$ . Roughly speaking if we think of True as being equal to the real number 1 and False as equal to the real number 0, then we want  $\hat{x}_i$  to approximate  $s_i$  and  $\bar{x}_i$  to approximate  $\neg s_i$ .

Next for all  $i \in [m], j \in [3]$ , define

$$z_{i,j} = \begin{cases} \hat{x}_k & \text{if } t_{i,j} = s_k \\ \bar{x}_k & \text{if } t_{i,j} = \neg s_k \end{cases}.$$

Then,

$$f(\mathbf{x}) = \sigma \left( \left( \sum_{i=1}^m f_i(\mathbf{x}) \right) - m + 1 \right) \quad (8)$$

$$\text{where, } f_i(\mathbf{x}) = \sigma \left( \sum_{j=1}^3 z_{i,j} \right) - \sigma \left( \left( \sum_{j=1}^3 z_{i,j} \right) - 1 \right).$$

Again, roughly speaking we want  $f_i(\mathbf{x})$  to approximate  $\bigvee_{j=1}^3 t_{i,j}$  and  $f(\mathbf{x})$  to approximate  $h(\mathbf{s})$ . The decomposition of  $f$  above is written just for ease of understanding, but in its following form, we can see that it can be computed in 2 layers and width  $2m$ , using  $\hat{x}_i$  and  $\bar{x}_i$

$$f(\mathbf{x}) = \sigma \left( \left( \sum_{i=1}^m \sigma \left( \sum_{j=1}^3 z_{i,j} \right) - \sum_{i=1}^m \sigma \left( \left( \sum_{j=1}^3 z_{i,j} \right) - 1 \right) \right) - m + 1 \right).$$

Thus, the construction of  $f$  from  $h$  is complete and we can see that this can be done in polynomial time. Now we need to prove the correctness of the reduction.

We first show that 3-SAT  $\implies$  BACKDOOR. This is the simpler of the two directions. Let  $\mathbf{s}$  be an input such that  $h(\mathbf{s})$  is TRUE. Then create  $\mathbf{x}$  as  $x_i = 1$  if  $s_i = \text{TRUE}$  and  $x_i = 0$  otherwise. Putting this in Eq. (8) gives  $f(\mathbf{x}) = 1$  and thus,  $f \not\equiv g$  on  $[0, 1]^n$ .

Now, we show BACKDOOR  $\implies$  3-SAT. Let there be an  $\mathbf{x}$  such that  $f \not\equiv g$ , which is the same as  $f(\mathbf{x}) > 0$ . First, assume that  $x_k \geq 0.5$ . Then, we see that increasing  $x_k$  increases  $\hat{x}_k$ . This would increase all the  $z_{i,j}$  which are defined as  $\hat{x}_k$ . Further,  $x_k \geq 0.5$  implies that  $\bar{x}_k = 0$  and thus increasing  $x_k$  does not further decrease  $\bar{x}_k$ . Thus, all the  $z_{i,j}$  which are defined as  $\bar{x}_k$  do not decrease. Note that  $f$  is a non-decreasing function of  $z_{i,j}$ . This means that we can simply set  $x_k$  to 1 and the value of  $f(\mathbf{x})$  will not decrease.

Similarly, for the case that  $x_k < 0.5$ , we can set  $x_k$  to 0 and the value of  $f(\mathbf{x})$  will not decrease.

This way, we can find a vector  $\mathbf{x}$  which has only integer entries: 0 or 1 and  $f(\mathbf{x}) > 0$ . Because  $f$  consists of only integer operations, this means that  $f(\mathbf{x}) \geq 1$ . Looking at Eq. (8) and noting that  $0 \leq f_i(\mathbf{x}) \leq 1$ , we see that this is only possible if  $f_i(\mathbf{x}) = 1$  for all  $i$ . Set  $s_i = \text{TRUE}$  if  $x_i = 1$  and  $s_i = \text{FALSE}$  if  $x_i = 0$ . Then  $f_i(\mathbf{x}) = 1$  implies that  $\bigvee_{j=1}^3 t_{i,j} = \text{TRUE}$  for all  $i$ . Thus,  $h(\mathbf{s})$  is TRUE.  $\square$

**Proposition 2** (Hardness of backdoor detection - II). *Let  $f : \mathbb{R}^n \rightarrow \mathbb{R}$  be a ReLU and  $g : \mathbb{R}^n \rightarrow \mathbb{R}$  be a function. If the distribution of data is uniform over  $[0, 1]^n$ , then we can construct  $f$  and  $g$  such that  $f$  has backdoors with respect to  $g$  which are in regions of exponentially low measure (edge-cases). Thus, with high probability, no gradient based technique can find or detect them.*

*Proof.* For ease of exposition, we create  $f$  and  $g$  with a single neuron. However, the construction easily extends to single layer NNs of arbitrary width. Also, assume we are in the high-dimensional regime, so that  $n$  is large. (Note that  $n$  here refers to the input dimension, not the number of samples in our dataset.)

Define the two networks and the backdoor as follows:

$$\begin{aligned} f(\mathbf{x}) &= \max(\mathbf{w}_1^\top \mathbf{x} - b_1, 0) \\ g(\mathbf{x}) &= \max(\mathbf{w}_2^\top \mathbf{x} - b_2, 0) \\ \mathcal{B} &= \{\mathbf{x} \in [0, 1]^n : \mathbf{w}_1^\top \mathbf{x} \geq b_2\} \end{aligned}$$

where  $\mathbf{w}_1 = (\frac{1}{n}, \frac{1}{n}, \dots, \frac{1}{n})^\top$ ,  $b_1 = 1$  and  $\mathbf{w}_2 = (\frac{1}{n}, \frac{1}{n}, \dots, \frac{1}{n})^\top$ ,  $b_2 = \frac{1}{2}$

Note that equivalently,  $\mathcal{B} = \{\mathbf{x} \in [0, 1]^n : \mathbf{1}^\top \mathbf{x} \geq \frac{n}{2}\}$  and its measure of is given by:

$$\begin{aligned} P(\mathcal{B}) &= P\left(\sum_{i=1}^n x_i \geq \frac{n}{2}\right) \\ &= P\left(\frac{1}{n} \sum_{i=1}^n x_i \geq \frac{1}{2}\right) \\ &\leq e^{-n/2} \end{aligned}$$

where the last step follows from Hoeffding's inequality. Since  $n$  is large, we have that  $\mathcal{B}$  has exponentially small measure.

We now compare the two networks on  $[0, 1]^n \setminus \mathcal{B}$ . Clearly  $\mathbf{w}_1^\top \mathbf{x} - b_1 < \mathbf{w}_2^\top \mathbf{x} - b_2 < 0$ .

Therefore,

$$f(\mathbf{x}) = g(\mathbf{x}) = 0 \quad \forall \mathbf{x} \in \mathbf{X} \setminus \mathcal{B}$$

and

$$\nabla f(\mathbf{x}) = \nabla g(\mathbf{x}) = 0 \quad \forall \mathbf{x} \in \mathbf{X} \setminus \mathcal{B}.$$

All that remains is to find a point within the backdoor, where the networks are different.

Consider  $\mathbf{x}_B = (1, 1, \dots, 1)^n$ .  $\mathbf{w}_1^\top \mathbf{x}_B - b_1 = 0$ . However,  $\mathbf{w}_2^\top \mathbf{x}_B - b_2 = 1 - \frac{1}{2} = \frac{1}{2}$ . Therefore,

$$\|f(\mathbf{x}_B) - g(\mathbf{x}_B)\| = \frac{1}{2}$$

Clearly,  $f$  and  $g$  are identical in terms of zeroth and first order information on the entire region  $[0, 1]^n$  except for  $\mathcal{B}$ . Therefore, any gradient based approach to find the backdoor region  $\mathcal{B}$  would fail unless we initialize inside the backdoor region, which we have shown to be of exponentially small measure.  $\square$
